# Supplementary material for: Stress Granule-Defective Mutants Deregulate Stress Responsive Transcripts
Source: PubMed Central journal article supplement (PMC4222700; doi:10.1371/journal.pgen.1004763), 2014-11-06
Supplement: pgen.1004763.s003.pdf [file pgen.1004763.s003.pdf]

## Supplementary Figure S3

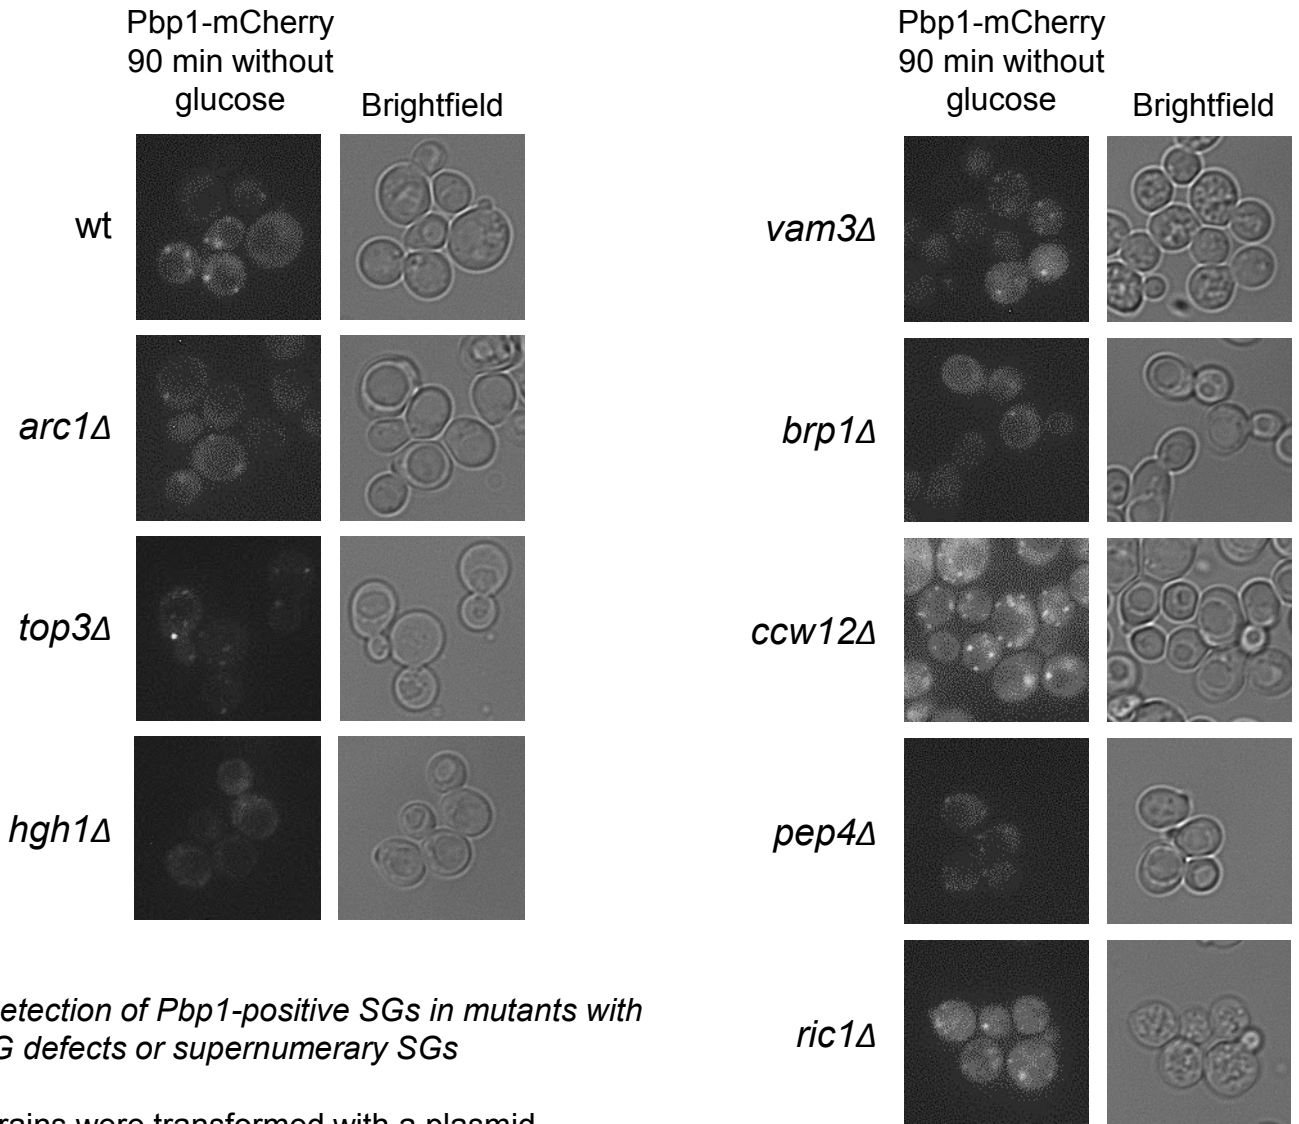

### Detection of Pbp1-positive SGs in mutants with SG defects or supernumerary SGs

Strains were transformed with a plasmid expressing Pbp1-mCherry (Swisher 2010) and grown until exponential phase. Glucose was removed, and samples were taken at the indicated times thereafter. Unfixed live cells were imaged and manual quantification of number of cells containing SG was performed. SG-Pab1 defective mutants: *arc1Δ*, *top3Δ*, *hgh1Δ*, and *vam3Δ*. SG-Pab1 supernumerary mutants: *brp1Δ*, *ccw12Δ*, *pep4Δ* and *ric1Δ*.

| Pbp1-mCherry (SD medium without glucose) |             |             |             |
|------------------------------------------|-------------|-------------|-------------|
|                                          | 15 min      | 90 min      | 135 min     |
| wt                                       | 15.2 ± 3.1  | 36.2 ± 4.8  | 37.3 ± 7.7  |
| <i>arc1</i>                              | 3.9 ± 1.0   | 30.1 ± 6.4  | 34.2 ± 9.1  |
| <i>top3</i>                              | 38.7 ± 9.9  | 50.4 ± 6.8  | 41.5 ± 7.2  |
| <i>hgh1</i>                              | 3.5 ± 4.3   | 22.1 ± 4.5  | 16.5 ± 3.0  |
| <i>vam3</i>                              | 9.6 ± 8.4   | 54.0 ± 8.2  | 54.8 ± 10.2 |
| <i>brp1</i>                              | 5.2 ± 4.4   | 16.7 ± 6.8  | 41.6 ± 6.3  |
| <i>ccw12</i>                             | 14.0 ± 14.7 | 61.5 ± 5.0  | 65.2 ± 14.5 |
| <i>pep4</i>                              | 12.6 ± 10.8 | 56.0 ± 20.6 | 59.3 ± 21.8 |
| <i>ric1</i>                              | 27.2 ± 16.9 | 59.3 ± 18.4 | 56.4 ± 7.7  |
