# Supplementary material for: Stress Granule-Defective Mutants Deregulate Stress Responsive Transcripts
Source: PubMed Central journal article supplement (PMC4222700; doi:10.1371/journal.pgen.1004763), 2014-11-06
Supplement: pgen.1004763.s005.pdf [file pgen.1004763.s005.pdf]

## Supplementary Figure S5

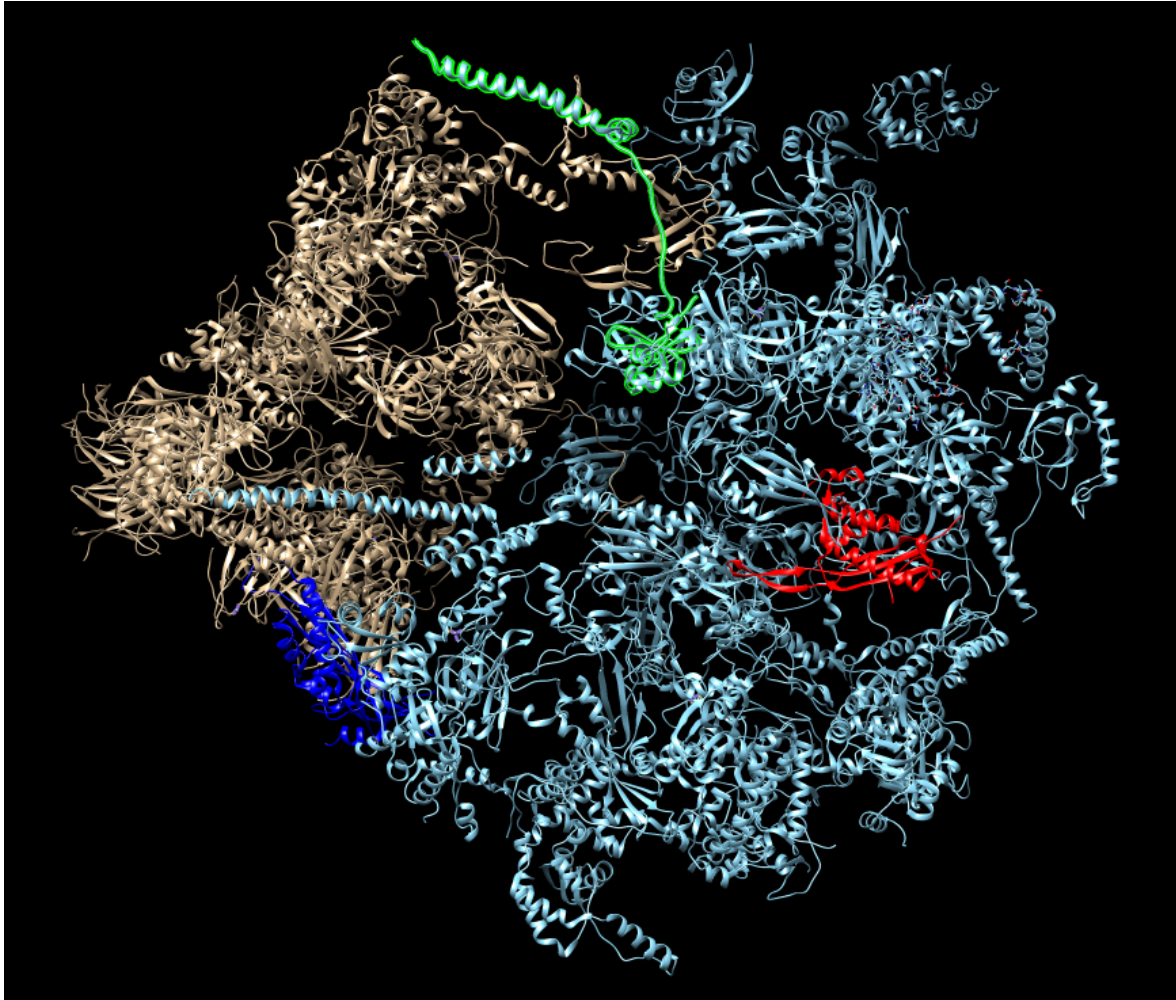

*Position in the ribosome of cRPs associated with strong SG-defects*

Red, Rpl20b; green, Rpl24a; blue, Rps10a. 60S subunit is shown in cyan; 40S subunit in beige.
