# Supplementary material for: Stress Granule-Defective Mutants Deregulate Stress Responsive Transcripts
Source: PubMed Central journal article supplement (PMC4222700; doi:10.1371/journal.pgen.1004763), 2014-11-06
Supplement: pgen.1004763.s006.pdf [file pgen.1004763.s006.pdf]

**Supplementary  
Figure S6**

| Mutant         | % cells with SGs |         |
|----------------|------------------|---------|
|                | 2DG              | 2DG+CHX |
| <i>his3</i>    | 23               | 2       |
| <i>brp1</i>    | 71               | 2       |
| <i>ypr045c</i> | 63               | 0       |
| <i>atg15</i>   | 43               | 3       |
| <i>ccw12</i>   | 76               | 0       |
| <i>snt1</i>    | 64               | 1       |
| <i>sub1</i>    | 65               | 0       |

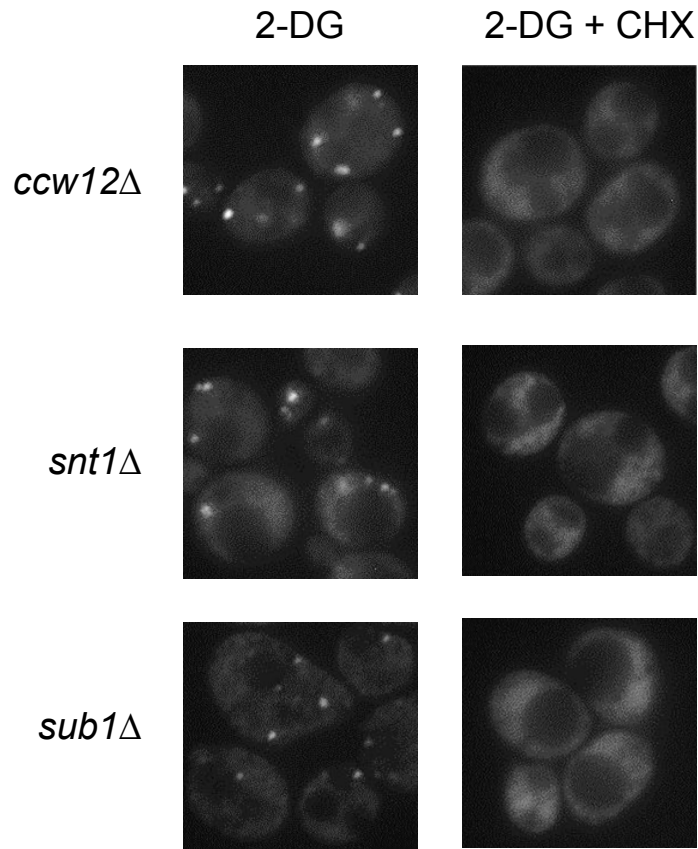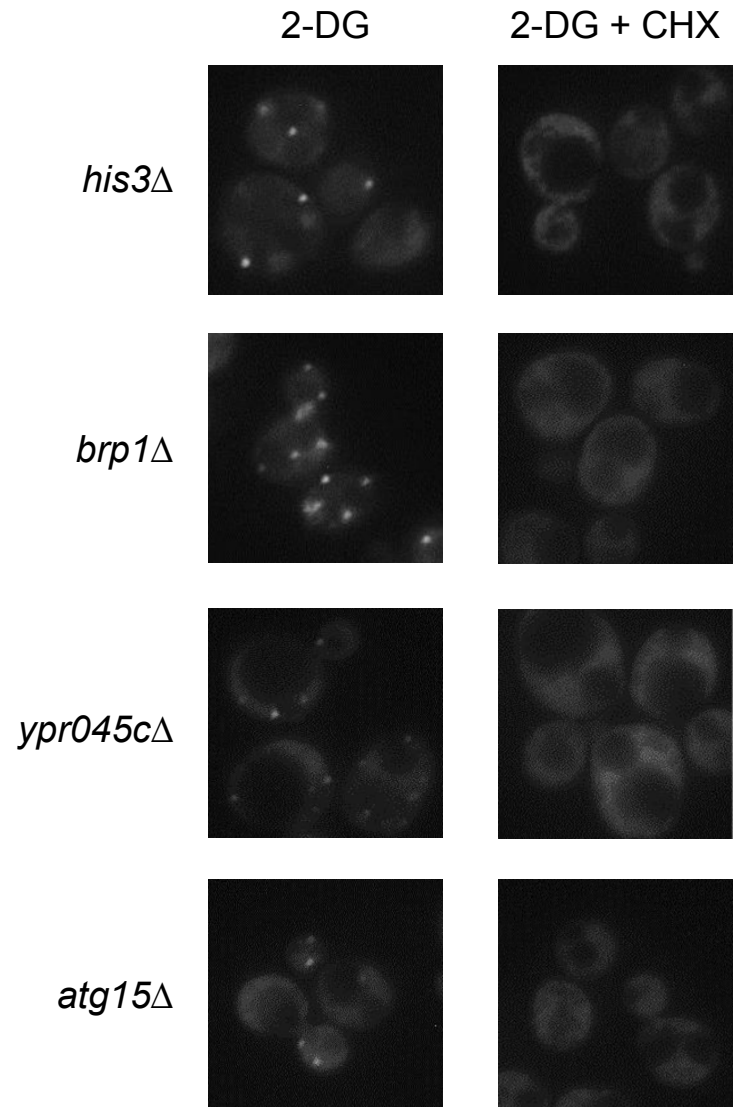

**Cycloheximide inhibits SG induction in mutants with supernumerary SGs**

Mutants with increased SG numbers in 2-DG (90 min) with or without pretreatment with cycloheximide
