# Supplementary material for: Stress Granule-Defective Mutants Deregulate Stress Responsive Transcripts
Source: PubMed Central journal article supplement (PMC4222700; doi:10.1371/journal.pgen.1004763), 2014-11-06
Supplement: pgen.1004763.s009.pdf [file pgen.1004763.s009.pdf]

## Supplementary Figure S9

### *Location of LCRs in proteins associated with SG defects*

The locations of LCRs (identified according to Li and Kahveci, 2006), within the 54 proteins associated with strong SG-defective phenotypes are shown.



>YML063W | RPS1B (PLC2, RP10B)

MAVXXXXXXXXXXXXXXXXXVDPFTRKEWFDIKAPSTFENRNVGKTLVNKSTGLKNASDA  
LKGRVVEVCLADLQGSSEHSFRKVKLRVDEVQGKNLLTNFHGMDFTTDKLRSMVRKWQTL  
IEANVTVKTSDDYVLRIFAIAFTRKQANQVKRHSYXXXXXXXXXXXXXKWISEILTREVQNST  
LAQLTSKLIPEVINKEIENATKDIFPLQNIHVVRKVKLLKQPKFDVGALMALHXXXXXXXXX  
XXXXXXFKDEVLETV

>YML121W | GTR1

MSSNNXXXXXXXXXXXXXXXXKSSMRSIIFSNYSAFDTRRLGATIDVEHSHLRFLGNMTLNLW  
DCGGQDVFMEYFTKQKDHIFQMVQVLIHVFDVESTEVLKDIEIFXXXXXXXXXXXXXXXXX  
XFVLLHKMDLVQLDKREELFQIMMKNXXXXXXXXXXXXXXXXXXXXTSIWDESLYKAWSQIVC  
SLIPNMSNHQSNLKKFKEIMNALEIILFERTTFLVICSSNGXXXXXXXXXXXXXXXXXVLLDP  
KRFEKISNIMNFKQSCTKLKSGFKTLILXXXXXXXXLSSNMVCFIVLKDMNIPQELVLE  
NIKKAKEFFQ

>YML017W | PSP2 (MRS15)

MGTNNTSNNNGTTKKMSLEEFGLNDTLGESVWDEEDINLDAISNTTIDILKQTKAGEHQ  
RDGHQQHPHGGHGMNRSRFSNAGPFGGSMGDFANHHHPLQHQQGXXXXXXXXXXXXXXXXX  
XXXXXXXXXXXXXXXXTKFIKFLFWEINKNPSISTLKSISFDQNFKRDSKVAFVELYTSRD  
MDKILNYWTTPLKEIYHITTAPAEFEDFKDYSTKVKLLTDPKDDAGKPFITKTQRSKSNP  
FGSAKPVDTQSKILDIEEKMENLHVEDTTTLRASLIPSSDSMATTATGSKITILKKQTPT  
EEESHSAPTPKPLSYSEVVERSUVNETSKKGTPLSKLDSPALELQSKPKSDEFKGGDE  
QGFEEKGGDDKAQLDVSNDKDKGSETDVKQFTFKNVXXXXXXXXXXXXXXXXXXXXXXXFX  
XXXXXXXXXXXXXXXXXXXXXXXXXXXXXXXXSSYXXXXXXXXXXXXXXXXXXXXXXXXXXXXX  
XXXXXXXXXLTSDSSLDASGNKKNDFNTSNTQQYSIFKPA SGFLGQGNDSIRNNGRGN  
YNSSGMNGGSRGRGFRGRGFXXXXXXXXXXXXXXXXXXXXXXXXXXXXNNRTTDMPL

>YNL091W | NST1

MPPNXXXXXXXXXXXXXXXXXGNSDXXXXXXXXXXXXXXXXXLYHTESDYPTSRVIKRAP  
NGDVIVEPINXXXXXXXXXXXXXXXXXXXXXXXXXXXXXXXXXXXXXXXXXESLSPEEKKTILRIEKE  
EVFNIRNYQDDHSCSCSVCGRXXXXXXXXXXXXXXXXXXXXXXXXXXXXPETNPIKFHLGIK  
ELQISKNQQNDLSSTKGEVVKNFLXXXXXXXXXXXXXXXXXXXXXXXXXXXXAHNETADNTS  
LLEENLNINHINKTSSEISANFNSVSDEELQKYSNFTKTFISSHPKIAEYVQKMMMYP  
NIRALTDDLMSNGQGFLNAIEDFVRDGGIQASKKDDSITEDEASSTDLTDPKEFTTMLH  
SGKPLTEDEYADLQRNIAERMNTNAYDTASKKFKDVSQLEKELFTRFMSGRDKKSFRELII  
QSFKNKFDGELGPSVLAATLSSCFSSQSKDTXXXXXXXXXXXXXXXXXXXXXXXXXXXXX  
XXXEGIEAVEKPEHDEKSNGIRETLHLSYDHDHQRNHPHHYXXXXXXXXXXXXXXXXXXYI  
SDIELPHDPHKHFHRXXXXXXXXXXXXXXXXXXXXXXXXXXXXTYDSGLDETDRLEEGRKLIQ  
IAITKLLQSRIMASYHXXXXXXXXXXXXXXXXXXXXXXXXXXXXXXXXXXXXXXXXXXXXXXXXX  
XXXXXXXXXKXXXXXXXXXXXXXXXXXXXXXXXXXXXXAXXXXXXXXXXXXXXXXXXXXXRLXXXXXXXXX  
XXXXXXXXXXLXXXXXXXXXXXXXXXXXXXXXXXXXXXXEKEEEERQLIAEDALRKQKLNEEQ  
TSANILSAKPFTENGVGNPVSSQSHPNMTNYQEDNSCSINDEILKMVNSVAASKPVSPTG  
FNVHDL LLPSTNNQMPAMEQSHLPQPGNQNNHFGTTTIPNALDLATKSSLQTENNYLMNS  
QTLENTSLLMHNNSSPTKLLPNDFGLSSWGGLTNTMSINPTCKPPVIQTSEMESQAHKSS  
PQATMPSFGLPNGGTHRKSFTDELNTLTSMLXXXXXXXXXXXXXXXXXXXXPPSQRSVWNDQKSS  
FSGPSTAGNFNNSIQSGMLLAPTLGVSFNPRTSIWDSSTTPMMNKSELSGRNITSTA  
QDSPAFMASNIWSSNSQYNSPYLTSNVLQSPQISSGVDESHILDSIYNTYLAISPQDSL  
PYIAIGTLFQNLVGLNLDYSTFINKLISMQGAYNCEFFTDNNGSITHVRFARQTPAGHSK  
GLLNQLFSGLNDPTATPFTSRPHTSTRASFPIASSTTQTS

>YNR050C | LYS9 (LYS13)

MGKNVLLLGSGFVAQPVIDTLAANDDINVTVACRDLANAQALAKPSGSKAISLDVTDDSA  
LDKVLADNDVVISLIPYTFHPNVVKS AIRTKTDVVTSSYISPALXXXXXXXXXXXXXXXXXX

XXGLDPGIDHLYAVKTIDEVHRAGGKLSFLSYCGGLPAPEDSDNPLGYKFSWSSRGVLL  
ALRNSAKYWKDGKIETVSSSEDLMATAKPYFIYPGYAFVCYPNRDSTLFDLYHIPEAETV  
IRGTLRYQGFPEFVKALVDMGMXXXXXXXXXXXXXXXXXXXXXALKQYLGAKSTSKEDLIASID  
SKATWKDDEDREILSGFAWLGLFSDAKITPRGNALDTLCARLEELMQYEDNERDMVVLQ  
HKFGIEWADGTTETRTSTLVDYGVGGYSSMAATVGYVVAIATKFVLDGTIKGPGLLAPY  
SPEINDPIMKELKDKYGIYLKEKTVA

>YNR051C | BRE5

MGVTVQDICFAFLQNYERMRTDPSKLAYFYASTAELTHTNYQSKSTNEKDDVLPVTKVT  
GRENINKFFSRNDAKVRSLKLDLDTIDFQYTGHHLKHSILIMATGEMFWTGTTPVYKFCQTF  
ILLPSSNGSTFDITNDIIRFISNSFKPYVLTASLSQSNEENSVSASVEEDKIRHESGVEK  
EKEKEKSPEISKPKAKKETVKDTPAPTESSTQEKPIVDHSQPRAIPVTKESKIHTETVPS  
STKGNHKQDEVSTEELGNVTKLNEKSHKAEKKAAPIKTKEGSVEAINAVNNSLPLNGKEV  
SDEKPVPGGVKEAETEIKPIEPQVSDAKESGNASTPSSSPEPVANPPKMTWASKLMNEN  
SDRISKNNTTVEYIRPETLPKPKTERKFEMGNRRDNASANSKNKKKPVFSTVNKDGFPYPI  
YIRGTNGLREEKLRSALKEFGKVMRITAADNFVXXXXXXXXXXXXXXXXXXXXXXXXXIDGIEV  
CLERKTVKKPTSNNPPGIFTNGTRSHRKQPLKRKD

>YOL039W | RPP2A (RPL44, RPLA2)

MKYLAAYLLLNAAGNTPDATKIKAILESVGIETIEDEKVSSVLSALEGKSVDELITEGNEK  
LAAVPAXXXXXXXXXXXXXXXXXXXXXXXXXXXXXXXXXXXXXXXXXXXXXXXXXXMGFGLFD

>YOR106W | VAM3 (PTH1)

MSFFDIEAQSSKGNSSQEPQFSTNQTKELSNLIETFAEQSRVXXXXXXXXXXXXXXXXXXXXL  
RYKIETELIPNCTSVRDKIESNILIHQNGKLSADFKNLTKYQSLQQSYNQXXXXXXXXLKT  
PISPGTSKERKDIHPRTEAVRQDPESYISIKVNEQSPLLHNEGXXXXXXXXXXXXXXXXXG  
LSXXXXXXXXXXXXXXXXXRSQQIGRIHTAVQEVNAIFHQLGSLVXXXXXXXXVTIDENISHLHD  
NMQNANKQLTRADQHQRDRNKCGKVTLXXXXXXXXXXXXXXXXXXXXX

>YOR014W | RTS1 (SCS1)

MMRGFKQRLIKTTGXXXXXXXXXXXXXXXXXXXXXXXXXXXXXXXXXXXXXXXXXXXXXXXXXSSAS  
STGSKSTTEKKGQSGSVPSQGHXHXXXXXXXXXXXXXXXXXXXXXXXXXXXXXXXXXXXXXXXXXX  
XXRKGXXXXXXXXXXXXXXXXXXGXAXXAAIMNPTPVLTVTKDDKSTSGEDHAHPTLLGAV  
SAVPSSPISNASGTAVSSDVENGNSNNNNMNINTSNTQDANHASSQSIDIPRSSHSFERL  
PTPTKLNPDTDLELIKTPQRHSSSRFEPSTRYTPLTKLPNFNEVSPEERIPFIKVDQCN  
TMXXXXXXXXXXXXXXXXXXXXXXXXXLDLIEFLVTNRFTYTNEYAHVVMNMFKINLFRPIPPV  
NPVGDIDYDPDEDEPVNELAWPHMQAVYEFFLRFVESPDFNHQIAKQYIDQDFILKLELF  
DSEDIRERDCLKTTLHRIYGKFLSLRSFIRSMNIFLQFIYETEFKFNVAELLEILGSI  
INGFALPLKEEHKVFLVRLIPLHKVRCLSLYHPQLAYCIVQFLEKDPLLTEEVMGLLR  
YWPKINSTKXXXXXXXXXXXXXXXXXXXXXXXXXXXXXXXXXXXXFVQLAKCISSPHFQVAEKVLSYWN  
NEYFLNLCIENAENVILPIIFPALYELTSQLELDTANGEDSISDPYMLVEQAINSGSWNRA  
IHAMAFKALKIFLETNPVXXXXXXXXXXXXXXXXXXXXXXXXXXXXXXXXXENWSKLEEYVKNLRINND  
KDQYTIKNPELRNSFNTASENNTLNEENENDCDSEIQ

>YOR038C | HIR2 (SPT1)

MRLKYPLDIHNEQVNALAALGPYIILAGSGGHVMAWRQQQLVDTAFDRVMIKDLKPEVS  
FQVDQDTXXXXXXXXXXLETLYIGSEHRLWGYSGWLCRDTNNINSVEKMNSKLLFECKSP  
STITDVKYDINLGILFVLLSNENKILLFRHKTXXXXXXXXXXXXASKPITGIIDPTGQFT  
VMTSDRSILVYQINKTGTHKLINKLTQHVMYPLHYRISMSPQADILPVINSVKGVNNA  
TSCTALLDRXXXXXXXXXXXXPSSNGCRVLVYSPAFYEKPNLKKGXXXXXXXXXXXXXXXXXD  
GTILVWNTKRMKPLFNALQVSSTAINDMSWSQDGXXXXXXXXXXXXXXXXXXXXFQEKDLGVAL  
PQXXXXXXXXXXXXXXXXXXXXLAEQIPKSFPENIKLEESASAAIPNDIGRSAVGXXXXX  
XXXXXXXXXXXXXXXXXIQSTSMEFNTPSYTVPRDLKRKPKKEATPSNXXXXXXXXXXELQPIDF

LDTGLLLPNTSFSRIRLATPKIRSTFKYSPINNPNLILDVKNNGSGNEQRPTXXXXXXXXXX  
XXXXVLFQDFIPKLITICTAGDTFWSFCSEDGSIYIYSDSGRKLMAPLVLGVSISFLEAC  
GTYLLCLTSIGELYCWNIEQKKLAFPTNTIYPLLNPRLYSDDILTRAENXXXXXXXXXX  
XXXXXXXXXNGDGYLFDKNMETWLLVSDGWWAYGSQYWDTTNTTGLXXXKANTDSFNNGSEN  
INEIVSDIKNDNQSIINFLECKTNDENLRKGRKLNLRQFARTILMKEGFENMEEIVTLSH  
XXXXXXXXXXXXXXXXPEEFKLMVYCIIRLSELGYMDRLNDVFQWLYDDLPISGTGSAFADK  
DFKRNLKILKILACGDIRQVQRVTTRYAKEMNIIS

>YOR078W | BUD21 (UTP16, YOR29-29)

MSNGHVKFDADQASASAVTDRQDDVLVSKKDKVHSSSDEESDDDDAPQEEGLHSGK  
SEVESQITQREEAIRLEQSQLRSKRRKQNELYAKQKKSUNETEVTDEVI AELPEELLKNI  
DQKDEGSTQYSSSRHVTFDKLDESDENEEALAKAIKXXXXXXXXXXXXXXXXXGKFRVQL  
LSTTQDSKTLPPKKESSIIRSKDRWLNRKALNKG

>YOR382W | FIT2

MKFSTIFGATTVMATAVSAAVSSVMTTKTITATNGNNVYTKVVTDADPIISYSTTRTV  
VSNSDATYTKVTEGPDTTSEKSTTKTLTLTNXXXXXXXXXXXXXXXXXXXXXXXXXXXXX  
XXXXXXXXXXXXXXXXXXXXXXXXXXXXLALGLISYLL

>YOR235W | IRC13

MGLYRPSKFFHPPHIPFTINPDFFSFHIQRLXXXXXXXXXXXXXXXXXDIYKGFVFCQ  
LDLVHLFSYVFFLFLKICVDVLQYVIYPKHFTHKKPGFENYSI

>YOR293W | RPS10A

MLMPKEDRNKIHQYLFQEGXXXAKKDFNQAKHEEIDTKNLYVIKALQSLTSKGYVKTQFS  
WQYYYYTLTEEGVEYLREYLNLPFHIVPGTYIQERNPTQRPQRRY

>YPL157W | TGS1

MGRTFIXXXXXXXXXXXXXXXXXXHSNFRTLKLLNNDAYKIESSKPLKNGKLFKYWKNXXXLF  
SKIDSASIYMTDELWFSVTPERXXXXXXXXXXXXXXXXXMPNAERILDVFCGGGGNTIQFAMQFP  
YVYGVDYSIEHIYCTAKNAQSYGVDDRIWLKRGSWKKLVSKQKLSKIKYDCVFGSPPWGG  
PEYLRNDVYDLEQHLKPMGITKMLKSFLKLSPNVIMFLPRNSDLNQLSRATRKLVPFAK  
CKVLYVKENGYMKGIFCMWGECCFFNYEPASTENSRRXXXXXXXXXXXXXXXXLXXXXXXXXX  
XXXKDNTVDIYDVNG

>YPR172W | ORF, uncharacterized

MAWTSTLPAHLLNLIKNSKYVHVATCSKDCIPSV ALMNYIYVPGEKLFQTDNKNDYIIF  
VSPQDTQKFYNIKENPKVALLFHDWIIANNLSVGKESISGXXXXXXXXXXXXXXXXXXXXX  
XXXXXXXXXXXXMSASIGGETEIVNPESEESKYYKDLILKANPDAKAFIFEKNTAVVKVRI  
DNARVSNENRTMFLSKGKS

>YFLO01W | DEG1 (PUS3, HRM3)

MSNFIRRLVGKMKAIKSTGTNAIVSKKDSIYANWSKEQLIRRITELENXXXXXXXXXXXXX  
XXXXXXXXXXXXXXXXXXXXXXXXXPKXXXXXXXXXXXXXXXXXAYLGWNYNGLAVQKEYTPLPTV  
EGTILEAMNKCKLVPSMVLQDYKFSRCGRDVKGVSAMNQVISLEVRSNLTDEEQRDPTND  
SREIPYVHVLNQLLPDDIRISAVCLRPPPNFDARFSCVHRHYKYIFNGKNLNIEKMSKAA  
SYFVGERDFRNFCGLDGSKQITNFKRTIISKILPLSETFYCFDLVGS AFLWHQVRCMMA  
ILFLVGQSLEVPEIVLRLTDIEKTPQRPVYEMANDIPLLLYDCKFPEMDWQEPTVDDYKA  
IKFTTATEALTLHYELKAAVCNIFKVDLPTANTNNFSKTIINLGDGRGKVVGTYVKLEDR  
XXXXXXXXXXXXXXXXXXXXNNKNK

>YNL284C | MRPL10

MKAERQTGLRNSFTTVIGRKLINTFVPSMMLT SVAGNDIFFRGLFKSPVLA FQSYRYVSI  
LGQLKPSDGSTKSFKRLXXXXXXXXXXXXXXXXXXXXXXXXXXXXXXXXX TPIYKLFPKI  
GFTNVGAKPXXXXXXXXXXWFHDKNRLHLQPGEVLD MNKMRKLGLVTGPIKYGVKILASG  
KFHYNLP IALEXXXXXXXXXXXXXXXXXGGKFTARYYTPLGLRAHLNPQWFLEXXXXXXXXX  
XXXXXXXXXXXXXXXXXG YLVM EKDKLLQDXXXXXXXXXXXXXXXXXVKKSSLEIELEELS  
PEKDWVPVVSNSKVMNIKALDH

>YLR238W | FAR10

MTGPGPEINKEEHPSSPGKKQITYXXXXXXXXXXXXXXXXXXXXXXXXX XIADPTKSYF  
PHSISRTPRRKYTYILVLTSLNGTFESKHVVIPFKPDGLKLRPVANSNXXXXXXXXLRGGK  
RVDSHTFSQVRSDNGNFDSRVL SRNHALLSCDPLTGK VYIRDLKSSNGTFINGQRIGSND  
VEIKVGDVIDLGT DIDTKIEHRKISATVEELFVQPLLESPIFENEDSDDCHTITEKEEAA  
AITSHIYGDSNNLEEEVILGSDTEILSGIFINNCIGTSPXXXXXXXXXXXXXXXXXXXX  
XXXXXXXXXXLINYTT HLEYTNKLLVEKNDQQLVKLQNGLRRLSGKYEKIIEQNRN QVKQ  
LERDHMFFKKSFEVKKRRNNEKQKSMEREIEDL KTRLEVERYKNSQMMKKNKQKEQELST  
ASKKKTTEHDTRGVPGMNPKGTDKFSIKNTLCNHFTLLTFTGISIGIIAIVFKILSPN

>YBR201W | DER1

MDAVILNLLGDIPLVTRLWTIGCLVLSGLTSLRIVDPGKVXXXXXXXXXXXXXXXXXXXX  
FDYGAFNWISMINIFVSANHLSTLENSFNLRKFCWIIFLLVILVKM TSIEQPAASLGV  
LLHENLVYYELKKNGNQMNVRFFGAIDVSPSIFPIYMNAV MYFVYKRSWLEIAMNFM PGH  
VIYYMDDIIGKIYGIDLCKSPYDWFRNTETP

>YBR076W | ECM8

MDYGYFFPAQRIEETNGVDFWIDSNAEFTQSKRPDSSTSTLSRVLTDTTNVSNNSGSLKR  
KTIKNKIFPQRKIFNDSENFDGKANTDCKHVFKSISKQLIFLPRCFQHHSIRGWMKD RY  
SEFGYKIKRNQNCPPXXXXXXXXXXXXXXXXX EESNPXXXXXXXXXXXXXXXXXXXXXELMCRF  
CQGNWILAENYLKHLFFAHGILSEFKPHTLYHFESKLLKIQGKLNFKIQVLKEPEFSK  
ILNSLTVSIIPSPLAYYTQTLNGGFRIHVKCPHCENWIRLGWCEYDEIIRDSFQDFESL  
RNLNADYNGMSYIQTRNREDIEGIYENYFTHYIQCDLATFR TKCLYVQVITKSN

>YBR106W | PHO88

MNPQVSNIIMLVMMQLSRRIDMEDPTIIMYIRILYCSSIGISWIIYQMARKRIVAKNDM  
TTMKYVEPGNAMSGEGEKLQVTTVRDYDLKEIDSAIKSIYTG MAMMGXXXXXXXXXXXX  
XXSISPVKSALEHNEVKIHLFGK PATGDLKRPFKAPSLFGGMGQTGPKTDKKSIEEAERA  
GNAGVKA E

>YGL174W | BUD13 (CWC26)

MALHQYLSETYGPTKPKNK TXXXXXXXXXXXXXXXXXXXXXXXXX RSLTLQXXXXXXXXXXXX  
XXXXXXXXXXNIWKNLETNELSHAITHPSASSITGNESKNDLKEIRAQEPLTVVADKSKTRK  
TIYRDAQGHKIQEDSKIDDSSFSRSKYEDEKAAEREQYLKNLNMGDVQKLGINVD AHDXX  
XNQTASSLTIEDPAITFTHXXXXXXXXXXXXXXXXXXXXX P APENRFAIMP GSRWDGVHRSNG  
FEEKWFAKQNEINEKKVQSYTLQEDY

>YGL199C | ORF, dubious

MEMYEISDTLWCGLVSLRCNAITSKMNQLDTNRL ENSDRACDTNREYNMINARGAHRSQL  
AEMSLSAAPISSEGLKNEGKCGYTTCSLELISTTSRFSVXXXXXXXXXXXXXXXXXXXXX P  
MLSATPPEAAKGASGSMKSGSIVVSSLPYDILPALL

>YGL031C | RPL24A (RPL30A)

MKVEIDSFSGAKIYPGRGTLFVRGDSKIFRFQNSKSASL FKQRKNPRRIAWTVLFRKHHK  
KGITEEVAKKRSRKT VKAQR PITGASLDLIKERRSLKPEVXXXXXXXXXXXXXXXXXXXXX  
XXXXXXXXXXXXXXXXXXXXXQQA KGAFQKVAATSR

>YLR234W | TOP3 (EDR1)

MKVLCVAEKNSIAKAVSQILXXXRSTSRDSGYMYVKNYDFMFSGFPFARNGANCEVTMTS  
VXXXXXXXXXXXXXXXXXGWGKCAIQELFDAPLNEIMNNNQKKIASNIKREARNADYLMIWTD  
CDREGEYIGWEIWQEAKRGNRLIQNDQVYRAVFSHLERQHILNAARNPSRLDMKSVHAVX  
XXXXXXXXXXXXXXXXXXLLTETLXXXXXXXXXXXXTKDGAKHRGGNKNDSQVVSYGTCQFP  
FVVDRFERIRNFVPEEFWYIQLVVENKDNNGGXXXXXQWDRGHLFDRLSVLTFYETCIETAG  
NVAQXXXXXXXXXXXXXXXXXXTTVELQKNCARYLRLNAKQSLDAAEKLYQKGFISYPRTE  
TDTFPHAMDLKSLVEKQAQLDQLAAGGRTAWASYXXXXXXXXXXXXXXXXXXXXXXXXXXXXX  
XXXXXXXXXIVSLGPEANXXXXXXXXXXXXXXXXXXXXXXXXXXSEDAKXXXXXXXXXXAVXXXXX  
XXXXXXXXNFLDVYPWARWETTKQLPXXXXXXXXXXXXXXXXXXXXGTTAPPKPMTESELILLM  
DTNGIGTDATIAEHIDKIQVRNYVRSEKVGKETYLQPTTLGVSLVHGFEAIGLEDSFAKP  
FQRREMEQDLKKICEGHASKTDVVKDIVEKYRKYWHKTNACKNTLLQVYDRVKASM

>YGL049C | TIF4632

MTDQRXXXXXXXXXXXXXXXXXXXXDNQYSGANNSQPNNHYNENLYSAREPHNNKQYQSKN  
GKYGTNKYNNRNSQGNAQYYXXXXXXXXXXXXXXXXDYNPAMPLPGMQWPANYYAPQMYIIPQ  
QMVPVASPPYTHQPLNTNPEPPSTPKTTKIEITTKTGERLNLKFFHEEKKASKGEEKNDG  
VXXXXXXXXXXXXXXXXXVLPANEAVKDTLTETSNEKSTSEAENXXXXXXXXXXXXXXXXXXXX  
XXXXXXXXXXXXXXXXXXXXSNHDNTDTTKPNSVIESEPIKEAPKPTGEANEVVIDGKXXXXX  
XXXXXXXXXXXXXXXXXXXXFXXXXXXXXXXXXXXXXXXXXXXXXXXXXXXXXXXXXGGKTVNKSDD  
TINSVITTEENTVKETEPSTSDIEMPTVSQLETLGKAQPISDIYEFAYPENVERPDIKYKKPSV  
K  
YTYGPTFLLQFKDKLFRPDPAWVEAVSSKIVIPPHIARNKPKDSGRFGGDFRSPSMRGM  
DHTSSRVXXXXXXXXXXXXXXXXXSNRGYXXXXXXXXXXXXXXXXXXXXXXXXXXXXLVPSANRWI  
XXXXXXXXXXXXXXXXXXXXXELFDKEEVERKMKSLNKL TLEMFDSSISSEILDIANQSKWED  
DGETLKIVIEQIFHKACDEPHWSSMYAQLCGKVVKDLDPNIKDKENEGKNGPKLVHLYLV  
ARCHEEFKGWADKLPAGEDGNPLEPEMMSDEYYIAAAKRRGLGLVRFIGYLYCLNLLT  
GKMMFECFRRLMKDLNNDPSEETLESVIELLNTVGEQFEHDKFVTPQATLEGSVLLDNLF  
MLLQHIIDGGTISNRIKFKLIDVKELREIKHWNSAKKDAGPKTIQQIHQEEEQLRQKKN  
S  
QRSNSRFNNHNQSNNSRYSSNRRNMQNTQRDXXXXXXXXXXXXXXXXXXXXXARKVEEVSQAPRA  
NMFDALMNNDGDS

>YBR093C | PHO5

MFKSVVYSILAASLANAGTIPLGKLADVDKIGTQKDIXXXXXXXXXXXXXXXXXXXXXXISRD  
L  
PEGCEMKQLQMVGRHGERYPTVSLAKTIKSTWYKLSNYTRQFNGLSFLNXXXXXXXXXXXX  
XXLEMETTFANSDDVLNPTYGEMNAKRHARDFLAQGYMVENQTSFAVFTSNSKRCHDTA  
QYFIDGLGDQFNITLQTVSEAESAGANTLSACNSCPAWDYDANDDIVNEYDTTYLDDIAK  
RLNKENKGLNLTSTDASTLFSWCAFEVNAKGYSDVCDIFTKDELVHYSYYQDLHTYYHEG  
PGYDIIKSVGSNLFNASVKLLKQSEIQDQKVWLSFTHD TDILNFLT TAGIIDDKNLTA  
E  
YVPFMGNTFHRSWYVPQGARVYTEXXXXXXXXXXXXXXXXXXXXXXAVVPIETCSTGPGFS  
CEIND  
FYDYAEKRVAGTDFLKVCSVSNSTELTFYWDWNTTHYNASLLRQ

>YDR128W | MTC5 (SEA3)

MCSSINEGPYNSPTFGKSLKVDGGFNAV SINPSGRDIVLASRQGLYIIXXXXXXXXXXXXX  
XXXXXXXXWQVADVQWSPHPAKPYWIVSTSNQKAIWNLAKSSSNAIEFVLHGHSRAITDI  
NFPNQHDPVLATCSVDTYVHAWDMRSPHRPFYSTSSWRSAAQVKWNYKDPNVLASSHGN  
DIFVWDLRKGSTPLCSLKGHVSSVNSIDFNRFKYSEIMXXXNDGTVKFWDYKSTTESKR  
TVTTNFPIWRGRYLPFGEGYCIIMPXXXXXXXXXXXXXXXXXXXXXSEQNKKTKLQPIYAFK  
GH  
SDRVIDFLWRSRHTCDGDYDDREFQLVTWSKDCDLKLWPXXXXXXXXXXXXXXXXXXXXX  
RLEEKL

PDYDYCSYNKEPENRENVQKNEFRRLRENFVXXXXXXXXXXXXXXXXXXXXXXXXXIRMNSATSQED  
LFNETKIQNLGEEVSAIGHKFPKVVFEKISVSTRELCLTLNGPWSEENPDDYIFLRISIN  
FPLNYPNKGDPKFTIEENSNTMSKRQEILSNLATIGQKYTDSNLYCLEPCIRFVLGEK  
VSLEDIEEGQEPLLNFDIADHIDFEELSSLDSSYSQNPENLSSQSDIESYKEALVFPD  
TSNQGLDFGRNLALDTPVPNGCGSCWTATGELFCFFANXXXXXXXXXXXXXXXXXXXXXG  
EKHPFKIEPQVLYDKEVDSSVITADELXXXXXXXXXXXXXXXXXXXXTNGXXXXXXXXXXXX  
XXXXXXXXXXXXXILRNDIIVRTKIPILRGNFKAFXXXXXXXXXXXXXTKXXXXXXXXXXXX  
XXXXXXXXRKELALEYLFMDATPEGFARNNALVAEKFDLDEISHXXXXXXXXXXXXXPY  
TTIWNNHPMGIKWFIEAIVXXXXXXXXXXXXXXXXXXXXVILSARRKKIPARYYGQELNMEG  
TIVFNDNESQNTSFWKGSDAFSTRSRSTVTPNFYGNHLRGKNIHGGDNSSIRSDDHHAR  
LRTHNTLNXXXXXXXXXXXXXXXXXXXXPFHSRMPDIKVELLHDDIIEAYEQEDLLHLEV  
SDIPKFQTYIYQYSKLLFRWGLPLERVKILKVSTDFXXXXXXXXXXXXXKSPYNGVLT  
HWIENNEFGEEKFLARNCNVCDLRVTRSSFICGNCQHVHSSCARIWWEIGDECPSGCGC  
NCPMFDA

>YER155C | BEM2 (IPL2, SUP9, TSL1)

MKGLLWSKNXXXXXXXXXXXXXXXXSHKXXXXXXXXXXXXXXXXXXXXXXXXXSGASPVMXXX  
XXXXXXXXXXXXXXXXDNNRDKRKSSVFPPSKQYTSTSSSQVNLGMYHSDTNTRSSRSIATL  
KDDSPVCXXXXXXXXXXXXXXXXXTPIAYXXXXXXXXXXXXXXXXXXXXLSPQSRCXXXX  
XXXXXXXXXXXXXXXXXXXXXXXXXXXXXXXXXXXXXXXXXNVIHLNSENVDTTVFKTGWVKNKSHGQX  
XXXXXXXXXXXXXXXXXXXXXXXXXQNLRNDAYSRNRESRFYGYXXXXXXXXXXXXXXXXXXXX  
XXXXXXXXMAIDPQMLVPDYRLYRAQLKGCVLNLYKSGLNSNIKFFDPTLPASNSSIANEN  
HQKKQQTNNQAQAEALHQKQSFQMGEPITLDLKYLSEVYPHPDLRQDSDGKIISGTIE  
SLCHTVLFYPGPKQSDVPNEKSLSKTHRAVINLLLMPLLDHFIFLKVFNQFGLSFTKN  
KSRLTNNSTQFYNISPAVDDSMQTQLALTAKTILDVFPGLLDEPMLKTIISLLDTISLH  
NDEISNNLKIKIANKHNEMLKLTAFTRSLPMATSSXXXXXXXXXXXXXXXXXITTLADEV  
HHINLKFDKVVAPKFDYSLLYDSKFINRRIVSLNPLVFNNQNIHFLGRLLISHLFTNP  
EFSKKVTPKVRAELLDKWVQIGCRFEHLGDMVSWLAVATIICSIPVLRXXXWXXXXXXXX  
XXXXXXXXXTIQLXXXXXXXXXXXXXXXXXXXXXXXXXXXXFTRANVISYFGDLLIHADDLPS  
DTKFKYLEKKINRTKNAFHKWQQLQAIDSTRHKTNSTENVRDNDSPNNVVYQLWKFHLS  
QPPLNIEGIMKLSVQHEPPIIDQKAYSTIGSQRSALVTGSYLPXXXXXXXXXXXXXXXXNT  
LVGXXXXXXXXXXXXXXXXXXXXXXXXXXXXXASNSHTMGSLTDDAMSSKNDNNKVTGVGK  
IDGPVIKEMSSXXXXXXXXXXXXXXXXXXXXXXXXXXXXFHISDELVFKSVYDNDGKSRPASMVIE  
TPKRFSQHSSMLINNPATPNQKMRDSLDTTGRLSKTLENMDFNIGQXXXXXXXXXXXX  
XXXXXXLEKIFDLLVLTSNIFSKLVDTKDLENYYYHQRQRXXXXXXXXXXXXXXXXXXXXAFV  
KLTMDNDXXXXXXXXXXXXXXXXXXXXVLENMAKRYVGAKSCSVSISKILDRSDDSKMKINE  
DTNLVSSSLYDQNFVWDMKVTDENINLIYMAKIQIGAAEAILHLVKNHYSDFTDDLCN  
NSTLLDIIKIMEQEVSTEWPTRIANSKLQKSLPENFVIETENLLTTLTDLFHGIKSAYXX  
XXXXXXXXXXXXXXXXXRIXXXXXXXXXXXXXXXXXXXXXXXXXXXXXMIRSFQKLHSTNYEDILE  
WIYQLDNFISKKFNLVSKKDWIVLFQELELLSKESLVSFFNYPLHFKSSKLINPGYLQLH  
EFEISNLFTWISTLILKDDNGTESLFFEKL PQSIKLLIKLHTSLTTFVMEISNVNKSSS  
ERLTTCKVILQILNYIRWKNGLDLFDSXXXXXXXXXXXXXIPAFIETAIAHAISPESRN  
YELSWIKASEKLSDPTKGTQNLRSISNVLEKIDDIHIKRFIEIDDVFSKNCKNLCPCPGW  
FISRLLEISQFVPNMSITNSKLINFDKRRFVNNIISNVLDLIPNEREFPLDIEMSDENPS  
KRTTFGRILFNNFEDVNKVYXXXXXXXXXXXXXXXXXXXXXXXXXXXXXXXXXIEKIKREARK  
LEVLLDQEKILKNSAALHQA VPKKNXXXXXXXXXXXXXXXXXXXXYNINKNTGQTPSLGSVMES  
NNSARNRRDSRASSTNRSSVVSNSHNGVXXXXXXXXXXXXXXXXXXXXNTXXXXXXXXXXXX  
XXXXXXXXKSILPSILPEVDSMQLHDXXXXXXXXXXXXXXXXXXXXXINHRNIPAXXAFKIVM  
QNGHEYLIQTASSDLTEWIKMIKASKRFSFHSKKYK GKTHNKIFGVPLEDVCERENTLI  
PTIVVKLLEEIELRGLDEVGLYRIPXXXXXXXXXXXXXEEGATDNSFTLEDDRWFEVNA  
IAGCFKMYLRELPDSLFSHAMVNDFTXXXXXXXXXXXXXXXXXXXXXRMNELLQKLPTCYQT  
LKRXXXXXXXXXXXXXXXXXXXXMDASNLAIVFSMSFINQEDLANSMGSR LGAVQTILQDFIKN  
PNDFYFKQ



>YGL105W | ARC1

MSDLVTKFESLIISKYPVSFTKEQSAQAAQWESVLKSGQIQPHLDQLNLVLRDNTFIVST  
LYPTSTDVHVFEXXXXXXXXXXXXXXXXXXXXXXXXXXRHILRWIDYMQNLLVSSTDKLEIN  
HDLDPHEVIEKKKKAPAGGAADAAKADEDVSKKAKKQDHPRGKPDXXXXXXXXXXXXXXXXXX  
XXXXXXXXXXXXXQQQEQQNKAPEKPKPSAIDFRVGFQKAIKHPDADSLYVSTIDVGDEEG  
PRTVCSGLVKHFPLDAMQERYXXXXCNLKPVNMRGIKSTAMVLCGSNDDKVEFVEPPKDS  
KAGDKVFFEGFGDEAPMKQLNPKKKIWEHLQPHFTTNDGLEVIFKDEEEKDHPVRKLTNA  
KGESFKVASIANAQVR

>YGL136C | MRM2

MILVYNRIRSIIXXXXXXXXXXXXXXXXXXQXXXXXXXXXXXXXXXXXXXXVQNLRRAAFKLMQI  
DDKYRLFskNRtdQRILDGYPGAWsQVARQRXXXXXXXXXXXXXXXXXXEPPHGVNSIQAN  
ILAKRTHDLIRLFFSKHFQLNRHDDLHKDHGYFQNMLEEELTHVKDTELYREIFTSDDIY  
ETPNTNSTLIEREKFPVDVIISDMYEPWPQTTGFWNNITNQAYFRMANTSGVSIRDHYQS  
IDLCDAAALVTAIDLLRPLGSFVCKLYTGXXXNLXXXXXXXXXXXXXXXXXXXXPDASRDESKET  
YYIGLKKKRNVDKLDVFSNS

>YGL154C | LYS5

MVKTTEVVSEVSKVAGVRPWAGIFVVEIQEDILADEFTFEALMRTLPLASQARILNKKSF  
HDXXXXXXXXXXXXXXXXXIVTGLNFQELKFDKGSFGKPFLDNNRFLPFSMTIGEYVAMF  
LVKCVSTDEYQDVGIDIASPCNYGGREELELFKEVFSEREFNGLLKASDPCTIXXXXXXX  
XXXXXXXXXXXXXXXXXXXXXXXXXXXXXXXXXXXXXXXXSMCITLDEVPLIFHSQWFNNEIVTICMP  
KSISDKINTNRPKLYNISLSTLIDYFIENDGL

>YGR092W | DBF2

MLSKSEKNVDLLAGNMSNLSFDGHGTPGGTGLFPNQNITKRTRPAGINDSPSPVKPSFF  
PYEDTSNMDIDEVSQPDMDVSNPCKLPPKfyERATSNTQRVVSVCkMYFLEHYCDMFD  
YVISRRQRTKQVLEYLQQSQLPNSDQIKLNEEWSSYLQREHQVLRKRRLKPKNRDFEMI  
TQVGQGGYGQVYLARKKDTXXXXXXXXXXXXXXXXXXXXXXXXXXXXXXXXXXXXRSEWLVKL  
LYAFQDLQSLYLAMEFVPGGDFRLLINTRCLKSGHARFYISEMFCAVNALHDLGYTHRD  
LKPENFLIDAKGHIKLTDFGLAAGTISNERIESMKIRLEKIKDLEFPAPTEKSIEDRRKM  
YNQLREKEINYANSMVGSPDYMALEVLEGKKYDFTVDYWSLGCMLFESLVGYTPFSGSST  
NETYDNLRRWKQTLRRPRQSDGRAAFSDRTWDLITRLIADPINRLRSFEHVKRMSYFADI  
NFSTLRSMIPPFTPQLDSETDAGYFDDFTSEADMAYADVFKRQDKLTAMVDDSAVSSKL  
VGFTFRHRNGKQGSSGILFNGLEHSDPFSTFY

>YLR264W | RPS28B

MDSKTPVTLAKVIKVLGRTGSRGGVTQVRVEFLEDTSRTIVRNVKGPXXXXXXXXXXXXXXXXXX  
XXARRLR

>YOR070C | GYP1 (YOR29-21)

MGVRSAAKEMHERDHNXXXXXXXXXXXXXXXXXASSKPKPSLYKMNTTESTSLPSGYAS  
SADRDRRTSDGNFEAMAKQQAstrrtsNSYSPLRYVNPTLSTASNESPRPALLRQHhXX  
XXXXQQRHSSSGSVGNCSNSTEPNKKGDryFKDLDEDWSAVIDDYNMpipILTNGGFG  
TPVAPTRTLsrkSTXXXIXXXXXXXXXXXXXXXXXXXXXXXXXXXXXLQKEKTNDskKTQLEIE  
NERDVQELNSIIQRISKFDNILKDKTIINQQDLRQISWNGIPKIHRXXXXXXXXXXXXXXXXXX  
XXXXXXXXXXXXXXXXXEYRDSLKHTFSDQHSRDIPTWHQIEIDXXXXXXXXXXXXXXXXXXXXX  
XXXXXLWairHPASGYVQGINDLVTpFFETFLTEYLPPSQIDDVEIKDPSTYmVDEQITD  
LEADTFWCLTKLLEQITDNYIHGQPGILRQVKNLSQLVKRIDADLYNHfQNEHVEFIQFA  
FRWMNCLLMREFQMGTVIRMWDTYLSETSQEVtSSYSMSsNDIKPPXXXXXXXXXXXXXXXXXX  
XKDFQSPttALSnmTPNNAVEDSGKMRQSSlNEFHVFVCAAFlikWSDQLMEMDFQETIT  
FLQNPPTKDWtETDIEMLLXXXXXXXXXXXXXXXXXXXXL

>YOR275C | RIM20

MSELLAIPLKRTLEVDFAELSKLXXXXXXXXXXXXXXXXXILKVV DARNNAIAPDISIDGL  
SALKEYYVILLQLEKKFPNNQIEFTWFQTL SQSRGTSQYSLQWEKLTIIYNIGCMYSL  
ALNSNNDAAESLKTSCLYFQNAAGCFKHVLDHQKNLETIPVVDDATLNAL TSLMLAQAQE  
CFWFKAVQDKHKDSLIAKLSQ QIVDFYCEAINDAQRGKLIRSDWINHLKAKKAYFSAVTY  
YRIALSFNEKXXXXXXXXXXXXXXXXXNESTLSSQAKFKTVV ESSLKEAQRDNEFIYLQE  
VXXXXXXXXXXXXXXXXXXXXXXXXXIKKDETLFKDLIPIEVMXXXXXXXXXXXXXXXXXRV  
TNPLASLNKLLKESXXXXXXXXXXXXXXXXXLSHYXXXXXXXXXXXXXXXXXKNVQVQLDNIEQIL  
NEEAFTDNQLRLKHGTLNWTLPESSTNTAYYXXXXXXXXXXXXXXXXXXXXXXXXXXXXXXXXX  
XNLIGSEIRLPESNDPLTNKIKMIIQERN DYIDRTRRKSSEYRILPKIITSYKKNGTVDF  
EPIFIGHLKYFDEDXXXXXXXXXXXXXXXXXVNL SKKNNPGRSGIEPKKMVRIDPRELYI  
EDLRYSFKLLDEVKXXXXXXXXXXXXXXXXXNLYNEVQ EYDTARRAEKARLDKSLTFED  
Q

>YPL106C | SSE1 (LPG3, MSI3)

MSTPFGDLGXXXXXXXXXXXXXXXXXXXXXXXXXSTPSVVGFGPKNRYLGEXXXXXXXXX  
XXXTVANLKRIGLDYHHPDFEQESKHFTSKLVELDDKKTGXXXXXGEKHVFSATQXXX  
XXXXXXXXXXXXXXXXKANITDVCIAVPPWYTEEQRYNIADAARIAGLNPVRIVNDVTAAGV  
SYGIFKTDLPEGEEKPRIVAFVDIGHSSYTCSIMAFKKGQLKVLGTACDXXXXXXXXXXXX  
XXXXXADEFKTKYKIDIRENPKAYNRILTAAEKLK KVL SANTNAPFSVESVMNDVDVSSQ  
LSREELEELVKPLLERVTEPVTKALAQAKLSAEVDFVEIIGGTTRIPTLKQSISEAFGK  
PLSTTLNQDEAIAKGAAFICAIHSPTLRVRPFKFEDIHPYXXXXXXXXXXXXXXXXXHMEVFP  
AGSSFPSTKLITLNRTGDFSMAASYTDITQLPPNTPEQIANWEITGVQLPEGQDSVPXXX  
XXRCDPSGLHTXXXXXXXXXXXXXXXXXPIPLXXXXXXXXXXXXXXXXXXXXXXXXXDDLTIVAHTF  
GLDAKKNELIEKENEMLAQDKLVAETEDRKN TLXXXXXXXXXXXXXXXXXAPFASDAEKT  
LQMLNKAEEWLYDEGFDSIXXXXXXXXXXXXXXXXXXXXXXXXXXXXXXXXXXXXXXXXXXXXX  
XXXXXXXXXXXXXXXXXXXXXXXXXXXXXXXXXTEGDVDM D

>YDR034C | LYS14

MFESVNL DENXXXXXXXXXXXXXXXXXXXXXXXXX SFTNSGTSTSCFEPKNNLPSLSF  
LNARAXXXXXXXXXXXXXXXXXXIGGENVESTTSSNDG SNENXXXXXXXXXXXXXXXXXXXX  
ISQADDNGHSSLTPNPAVTSTVTDKKG NXXXXXXXXXXXXXXXXXMKCDETKPTCWQCA  
RLNRQC VYVLNPKNKKRRTSNAQRVKEFRKHSTSLDNDHNNXXXXXXXXXXXXXXXXXXXX  
NLSEDTTDPKPITDNGKNVPXXXXXXXXXXXXXXXXXNGYDVNLLMQNLNDMVNMKLHD  
SYLLNEELKGLDLPDLIPELLPASNVNSSVPISFLVNNVITFNTKLS SFKLGGIHDKYL  
KIFYDCLDSIAPFFQNQGNPLRDILLSFAKNEAYLLSSILATGASIA YRKSNNLEDERN  
YCAYLSHCLSLG EQFKNESVNLNRIEPIILTVIMLA WDCIYSMNSQWRSHLKGVTDLFK  
KINAGNSSKVLNVAKCFKVMETFASISTVFGGSLIDNNDLDAIFDPYDYQYVDSLKFLN  
IMTPLNEFNLLRGHKEDFDLVIKEVFKSLNTIRSTEKNYFSKEEGLFTK KLDYLLSSQT  
SSEKSKDQISYFNTQKILVEIDKQLDYEFIDKSGIIPSDNQSHPRISNIHDNAIDMVTLK  
NGEEVAISXXXXXXXXXXXXXXXXXXXXXXXXXGMPKESSTIQQVVKKIMSFFKFLDS DSPPQ  
NSRTCYSNFAVLIAGLNAMDEETRAIVKRYKINGGKFQKLTEHNLNRLEKVWYGKNQNY  
RLEEQDVLTW

>YJL124C | LSM1 (SPB8)

MSANSKDRNQSNQDAKRQQQNFPPKISEGEADLYLDQYNFTTTAAIVSSVDRKIFVLLRD  
GRMLFGVLRFTDQYANLILQDCVERIYFSXXXXXXXXXXXXXXXXXXXXXXXXXXXXXXXXXVDIDKE  
DQPLEAMERIPFKEAWLTKQKNDEKRFKEETHKGKMMARHGIVYDFHKSDMY

>YGL045W | RIM8 (PAL3, YGL046W, ART9)

MSLLRLWNKESRAPSKIKSHGIVGSYGN SMLAHNNVKQFRIDIDEPHRVWKP NESITGEA  
VIDIKRDITNVAIKLSLVCEVRVKTGNSPTS KNKRIEKTLEKSTFLYGQDYVKTAFA SAK

KKPHVDKTTILNGLSKGEHRFPFRIRIPRGRGMLSSIKFERGSITYFLSCTLES LNNING  
LKKPEARCEREFVIVPLDVSRLPKPKTKTVVLQSASMVQNKKNKSTEDSSSYTQLTQK  
STTSNSSSSSVNSKTSPLPNKTVTISVDIPQAGFMIGEIIPIIDVKIDHXXXXXXXXXXXXX  
XXXXXXXXXXXXXXXXXXXXXXXXXXXXXICQSIPIYINPETLQFQSRVYLKVPLDAFSTLTTVG  
KFFSFQYYIEVMVNLSKKNVYTESNRIIGTPIGEQNGLGVENNINRIQRKMLRMVNPET  
LENDSEGYESSIFFKDMVNVEKLKRLRNVTGMSIETVIGTTRSEQQQSDASIPSQSSITA  
PQNSPSNLRDWLAPLNAYDSDDVPVPKYSPNDKVSVPSEDKQELEQKRLQQLES DPPPCD  
DY

Range of low complexity regions with p-values:

---

>YBL087C

135-137 p-value: 0.000e+00

>YAL018C

55-71 p-value: 3.583e-01

85-99 p-value: 4.927e-02

188-213 p-value: 5.761e-02

>YDL081C

65-81 p-value: 3.416e-15

>YDL136W

73-91 p-value: 1.474e-02

>YDR076W

53-68 p-value: 1.477e-02

152-154 p-value: 0.000e+00

>YLR181C

123-137 p-value: 3.642e-03

188-203 p-value: 7.773e-03

222-238 p-value: 2.896e-01

280-293 p-value: 2.045e-01

312-327 p-value: 4.125e-01

>YML062C

260-275 p-value: 3.766e-06

345-381 p-value: 2.494e-01

385-387 p-value: 0.000e+00

>YML063W

4-19 p-value: 1.504e-04

156-165 p-value: 1.587e-01

233-246 p-value: 5.227e-03

>YML121W

6-18 p-value: 2.628e-02

106-121 p-value: 3.739e-01

147-163 p-value: 3.768e-07

222-235 p-value: 8.926e-03

270-277 p-value: 2.437e-06

>YML017W

107-133 p-value: 3.523e-03  
398-417 p-value: 1.589e-06  
419-449 p-value: 4.673e-14  
453-488 p-value: 1.160e-35  
562-584 p-value: 1.753e-06

>YNL091W

5-21 p-value: 1.289e-10  
26-42 p-value: 3.116e-02  
71-103 p-value: 1.281e-01  
144-166 p-value: 2.604e-03  
206-230 p-value: 5.133e-02  
452-483 p-value: 6.255e-16  
524-538 p-value: 7.998e-09  
556-580 p-value: 1.163e-30  
617-635 p-value: 8.642e-02  
637-668 p-value: 2.712e-70  
671-690 p-value: 3.957e-11  
692-709 p-value: 3.856e-10  
712-730 p-value: 4.682e-04  
732-755 p-value: 2.592e-14  
992-1006 p-value: 1.856e-16

>YNR050C

105-122 p-value: 5.315e-01  
263-279 p-value: 1.706e-01

>YNR051C

457-474 p-value: 2.093e-03

>YOL039W

67-99 p-value: 7.962e-06

>YOR106W

44-59 p-value: 4.544e-02  
112-117 p-value: 1.344e-01  
165-179 p-value: 2.032e-20  
183-195 p-value: 1.421e-01  
223-227 p-value: 1.214e-04  
268-282 p-value: 1.654e-07

>YOR014W

16-55 p-value: 3.184e-43  
85-104 p-value: 1.504e-17  
106-122 p-value: 1.466e-05  
126-141 p-value: 2.916e-10  
143-147 p-value: 0.000e+00  
303-321 p-value: 1.686e-01  
550-576 p-value: 2.590e-02  
679-701 p-value: 1.310e-01

>YOR038C

68-77 p-value: 1.977e-08

153-163 p-value: 6.273e-03

250-261 p-value: 1.094e-03

286-299 p-value: 2.306e-02

335-350 p-value: 5.636e-02

364-381 p-value: 5.410e-01

416-433 p-value: 5.955e-03

464-473 p-value: 2.976e-02

532-544 p-value: 2.096e-01

651-667 p-value: 1.021e-01

705-707 p-value: 0.000e+00

781-793 p-value: 3.567e-01

>YOR078W

158-173 p-value: 3.317e-02

>YOR382W

93-143 p-value: 3.373e-04

>YOR235W

34-49 p-value: 3.428e-03

>YOR293W

20-22 p-value: 0.000e+00

>YPL157W

7-20 p-value: 1.193e-06

56-58 p-value: 0.000e+00

83-94 p-value: 1.707e-02

277-290 p-value: 1.457e-04

292-303 p-value: 3.269e-03

>YPR172W

101-131 p-value: 2.137e-07

>YFL001W

49-80 p-value: 1.432e-01

83-98 p-value: 1.005e-01

422-437 p-value: 4.083e-01

>YNL284C

78-110 p-value: 2.240e-08

130-139 p-value: 1.788e-01

192-206 p-value: 2.714e-03

232-257 p-value: 2.871e-01

271-286 p-value: 3.359e-01

>YLR238W

25-51 p-value: 4.124e-01

110-115 p-value: 0.000e+00

281-309 p-value: 1.130e-01

>YBR201W

42-59 p-value: 4.060e-01

>YBR076W

136-150 p-value: 2.179e-01

157-174 p-value: 7.746e-02

>YBR106W

108-122 p-value: 3.375e-01

>YGL174W

21-42 p-value: 1.507e-06

49-68 p-value: 2.152e-02

179-181 p-value: 0.000e+00

200-217 p-value: 3.927e-01

>YGL199C

102-119 p-value: 8.051e-02

>YGL199C

102-119 p-value: 1.043e-01

>YGL031C

101-140 p-value: 5.496e-05

>YLR234W

21-23 p-value: 0.000e+00

62-75 p-value: 9.180e-02

180-195 p-value: 4.180e-01

202-211 p-value: 3.508e-02

272-275 p-value: 8.493e-17

305-321 p-value: 1.638e-01

395-428 p-value: 1.248e-02

438-457 p-value: 2.567e-01

464-472 p-value: 4.063e-02

475-487 p-value: 2.991e-01

506-522 p-value: 9.845e-02

>YGL049C

6-24 p-value: 1.031e-20

82-94 p-value: 8.293e-10

182-197 p-value: 1.659e-02

224-256 p-value: 5.860e-02

296-314 p-value: 1.244e-03

316-343 p-value: 8.565e-04

489-502 p-value: 3.374e-05

509-531 p-value: 3.174e-05

541-558 p-value: 3.331e-02

872-887 p-value: 4.075e-02

>YBR093C

38-55 p-value: 2.487e-01

111-122 p-value: 1.869e-18

385-400 p-value: 1.942e-02

>YDR128W

51-67 p-value: 2.241e-01  
219-221 p-value: 0.000e+00  
266-282 p-value: 8.873e-04  
340-354 p-value: 1.831e-01  
392-409 p-value: 5.340e-01  
640-658 p-value: 2.933e-02  
689-704 p-value: 3.624e-03  
708-732 p-value: 2.591e-13  
755-767 p-value: 4.268e-01  
770-786 p-value: 5.685e-02  
823-838 p-value: 3.381e-03  
861-876 p-value: 2.368e-02  
969-988 p-value: 2.156e-02  
1057-1070 p-value: 1.519e-03

>YER155C

10-24 p-value: 3.391e-22  
28-50 p-value: 8.634e-22  
58-73 p-value: 1.722e-20  
129-146 p-value: 2.870e-03  
152-168 p-value: 4.605e-01  
177-213 p-value: 7.774e-11  
240-260 p-value: 9.957e-13  
279-307 p-value: 4.444e-04  
576-592 p-value: 3.403e-01  
709-711 p-value: 0.000e+00  
713-729 p-value: 7.680e-02  
735-758 p-value: 9.180e-02  
885-898 p-value: 1.638e-08  
904-913 p-value: 5.864e-14  
915-931 p-value: 4.790e-02  
972-993 p-value: 2.488e-01  
1069-1086 p-value: 1.662e-01  
1121-1137 p-value: 1.832e-01  
1148-1165 p-value: 1.044e-06  
1319-1333 p-value: 4.308e-01  
1336-1362 p-value: 4.338e-05  
1529-1540 p-value: 1.261e-04  
1701-1730 p-value: 3.698e-02  
1766-1781 p-value: 1.615e-01  
1831-1847 p-value: 8.076e-07  
1850-1867 p-value: 7.333e-03  
1886-1903 p-value: 1.613e-01  
1912-1914 p-value: 0.000e+00  
2006-2019 p-value: 2.001e-04  
2067-2083 p-value: 2.790e-01  
2104-2119 p-value: 3.595e-01

>YGL105W

73-95 p-value: 9.144e-02  
168-191 p-value: 4.887e-20

262-265 p-value: 0.000e+00

>YGL136C

13-27 p-value: 5.693e-02

29-45 p-value: 2.108e-01

94-108 p-value: 3.091e-02

269-271 p-value: 0.000e+00

274-289 p-value: 2.612e-01

>YGL154C

63-78 p-value: 9.094e-07

174-192 p-value: 7.368e-02

194-212 p-value: 4.120e-01

>YGR092W

200-232 p-value: 3.249e-02

>YLR264W

48-62 p-value: 4.527e-01

>YOR070C

17-34 p-value: 7.808e-03

119-124 p-value: 1.087e-45

195-197 p-value: 0.000e+00

199-223 p-value: 5.656e-03

287-313 p-value: 9.641e-02

341-365 p-value: 1.629e-01

527-541 p-value: 2.681e-08

620-636 p-value: 1.888e-01

>YOR275C

25-39 p-value: 3.663e-02

252-267 p-value: 2.056e-02

302-325 p-value: 1.201e-10

343-358 p-value: 1.287e-01

375-391 p-value: 4.404e-01

396-406 p-value: 6.515e-03

453-481 p-value: 1.411e-01

555-571 p-value: 3.839e-01

615-632 p-value: 4.228e-03

>YPL106C

11-34 p-value: 1.032e-01

52-63 p-value: 1.333e-01

102-107 p-value: 6.683e-01

118-134 p-value: 4.555e-02

230-245 p-value: 3.052e-02

401-414 p-value: 1.255e-02

478-482 p-value: 2.903e-04

492-505 p-value: 8.929e-06

510-530 p-value: 3.344e-04

575-589 p-value: 3.617e-05

621-685 p-value: 8.506e-13



>YDR034C

11-37 p-value: 1.637e-03

66-84 p-value: 3.803e-01

104-166 p-value: 4.924e-02

223-278 p-value: 9.878e-02

669-690 p-value: 1.002e-02

>YJL124C

90-114 p-value: 2.532e-03

>YGL045W

289-323 p-value: 3.321e-01

### **Underlined low complexity regions:**

>YBL087C

MSGNGAQQGTFKRISLGLPVGAIMNCADNSGARNLYIIAVKSGSRLNRLPAASLGDMVMA  
TVKKGKPELRKKVMPAIVVRQAQSWRRRDGVFLYFEDNAGVIANPKGEMKGSAITGPVGK  
ECADLWPRVASNSGVVV

>YAL018C

MSFTGSLALAGIGGLVYKFGGGQSYEKLPYVNIPFNQYLDKVKYKHHFSKVMRSRTRYVLMN  
FFKDAFTGGAFMYPFKGFLEFNTNKSSYSTTMLGILSSYLIMFALVSFVYWATITPMYTA  
FLIVLGPIGLFIAIFHSFLQANVFTLLFMRLSHFNNHLVEVCLEKNGLEENLSEVKPIKY  
YAPINSIYFWAYYFPFKLVKYMLGLSVLFLVLLVISFFPLIGPILFHILISPFITQIYFTK  
VLRQLQNFQNIQRRENIYLHAGQYASFGFLAGLIESVPILAGFAISTNTIGSVLFLNLDHPM  
VPENLVETQAEIEAAPQDINQQPNQ

>YDL081C

MSTESALSYAALILADSEIEISSEKLLTLTNAANVPVENIWADIFAKALDQNLKDLLVN  
FSAGAAAPAGVAGGVAGGEAGEAEAEEKEEEEEAKEESDDDDMGFGLFD

>YDL136W

MAGVKAYELRTKSKEQLASQLVDLKKELAEKLVQKLSRPSLPKIKTVRKSIACVLTVINE  
QQREAVRQLYKGGKYQPKDLRAKKTRALRRALTKFEASQVTEKQRKKQIAFPQRKYAIIKA

>YDR076W

MSLGIPLSQLIVESPKPLSSGITGLDEILNLGFQARSIYEIFGPPGIGKTNFGIQLVCNS  
LEGIQQSEINDDKILWIETFQEMPINILRERFQFKIVEENVKRVRITKFGQLLYFFQNL  
FKLSQSVRYKLVIIDGFSQLVCDHLCTLKRGGMIDKTIHELKCRHLILIFTVMTKYTH  
STGSTIIVLNDCMNTAFQSNEFESLEEYIEILDDGSNFFVNSNNERRKNNVHILKSALVA  
NIAMGSKDSTWEVFLRDRIGLFRDWEQVDET V FVKSkrvkasssqsNEGCTTIKEMRIN  
KRNfENLRIAIVFNLHGEDRKREGRNLKRSRSSDDRNYIVKFDKATGQLRDIIDLKPD  
TANIASFPTLSTSSSSCSQVFNNIDSNDNPLPNAEGKEEIIYDSEG

>YLR181C

MASNAARVVATAKDFDKVGLGIIGYYLQLYAVELILSEEDRSQEMTALATELLDTIEAFK  
KEIGGESEAEDSDKSLHVMNTLIHDQEKAKIYMLNFTMSLYNEKLLKQKDGPDVMLKRS  
LWCCIDLFSCILHLWKENISETSTNSLQKRIKYCKIYLSKLAKGEIGSSDEKTLDYADFA  
DDSEEIKDEDVDHQTSDLENNNNNDKVEGLAPKDQTTSYEPVDEVPEFIDDADSVNEEEQ  
VDKNEDAITKDEQQVVKKEVDLTRPSAPSEPAEAAEHKSYTKDELTKIMDRASKIEQIQKL

AKY AISALNYEDLPTAKDELTKALDLLNSI

>YML062C

MPLSQKQIDQVRTKVHYSEVDTPFNKYLDILGKVTKLTGSIINGTLSNDDSKIEKLTEQN  
ISQLKESAHLRFLDLQSSIDTKKVADENWETCQQETLAKLENLKDCLPDIKSIHSKLLLR  
IGKLQGLYDSVQVINREVEGLSEGRTSLVVTRAWEKELGTDLVKFLIEKNYLKLVDPGL  
KKDSSEERYRIYDDFSKGPKELESINASMKSIDIENVRQEVSSYKEKWLRDAEIFGKITSI  
FKEELLKRDLGLLNEAEGDNIDEDYESDEDEERKERFKRQRSMVEVNTIENVDEKEESDHE  
YDDQEDEENEEEDDMEVDVEDIKEDNEVDGESSQQEDNSRQGNNEETDKETGVIEEPDAV  
NDAEEADSDHSSRKLGGTTSDFSASSSVEEVK

>YML063W

MAVGKKNRLSRGKKGLKKKVDPFTRKEWFDIKAPSTFENRNVGKTLV NKSTGLKNASDA  
LKGRVVEVCLADLQGSSEHSFRKVKLRVDEVQGKNLLTNFHGMDFTTDKLRSMVRKWQTL  
IEANVTVKTSDDYVLRIFAIAFTRKQANQVKRHSYAQSSHIRAIRKVISEILTREVQNST  
LAQLTSKLIPEVINKEIENATKDIFPLQNIHVRKVKLLKQPKFDVGALMALHGEESGEEK  
GKKVSGFKDEVLETV

>YML121W

MSSNNRKKLLL MGRSGSGKSSMRSIIFSNYS AFDTRRLGATIDVEHSHLRFLGNMTLNLW  
DCGGQDVF MENYFTKQKDHIFQMVQVLIHVFDVESTEVLKDIEIFAKALKQLRKYSPDAK  
IFVLLHKMDLVQLDKREELFQIMMKNLSETSSEFGFPNLIGFPTSIWDES LYKAWSQIVC  
SLIPNMSNHQSNLKKFKEIMNALEIILFERTTFLVICSSNGENSNENHDSDDNNNVLLDP  
KRFEKISNIMKNFKQSCTKLKSGFKTLILNNNIYSELSSNMVCFIVL KDMNIPQELVLE  
NIKKAKEFFQ

>YML017W

MGTNNTSNNNGT TTKKMSLEEF LGNDTLGESVWDEEDINLDAISNTTIDILKQTKAGEHQ  
RDGHQHPHGGHGPMNRSRFSNAGPFGGSMGDFANHHHPLQHQQGPPYIVKFSDLPPRF  
SNFDIEDLFQAKFTKFIKFLWEINKNPSISTLKS GSIFDQNFKRDSKVA FVELYTSRD  
MDKILNYWTTPLKEIYHITTAPAEFEDFKDYSTKVKLLTDPKDDAGKPFITKTQRSKSNP  
FGSAKPVDTQSKILDIEEKMENLHVEDTTTLRASLIPSSDSMATTATGSKITILKKQTPT  
EEESHSA TPTPKPLSYSEVVERS VVNETS KKGTPLSKLDSPAELQSKPKDSDEFKGGDE  
QGFEKGGDDKAQLDVSNDKDKGSETDVKQFTFKNVEREHSMSRTKYNGNHNNNNNGNFRG  
SNRYRGGPNGSSYKGGHNNRGNRGGYRGGSSYNNNNNNTNDNNNNNNNSSSNNNNGSRYH  
DRQNNEEGLTSDSSLDASGNKKNDFNSTSNTQQYSIFKPASGFLGQGNDSIRNNGRGN  
YNSSGMNGGSRGRGFGRGRGFGRGAYNNRGRGGRGSSGNYSNYNNR TTDMP

>YNL091W

MPPNSKSKRRKNKSKQH NKNGNSDPEQSINPTQLVPRMEPELYHTESDYPTSRVIKRAP  
NGDVIVEPINTDDDDKERTANLTHNKDSMDSASSLAFTLDSHWESLSPEEKKTILRIEKE  
EVFN VIRNYQDDHSCSCSVCGRRHLAMDQEMERIYNTLYAMDKDKDPETNPIKFHLGIIK  
ELQISKNQQQNDLSSTKGEVVKNFLSSSTVGS LKEEVLHFKQKQLSKQEQA HNETADNTS  
LLEENLNNIHINKTSSEISANFNSVSDEELQKYSNFTKTFISSHPKIAEEYVQKMMMY P  
NIRALTDDL MNSNGQGF LNAIEDFVRDGGIQASKKDDSITEDEASSTDLTDPKEFTTMLH  
SGKPLTEDEYADLQRNIAERM TNAYDTASKKFKDVSQLEKELFTRFMGRDKKSFRELII  
QSFKNKFDGELGPSVLAATLSSCFSSQSKDTS LDTDSIYEDEDEEDYDDYSEYAEDSEEV  
SEYEGIEAVEKPEHDEKSNGIRETLHLSYDHDHQRQNHPHHHYHSTSTHSEDELSEEEYI  
SDIELPHDPHKHFHRDDDILDGDEDEPEEEDENEGDDEEDTYDSGLDETDRLEEGRKLIIQ  
IAITKLLQSRIMASYHEKQADNNRLKLLQELEEEK RKKREKEEKKQKKREKEKEKKRLQQ  
LAKEEEKRKRREEEKERLKKELEEREMRRREAQRKKVEEAKRKKDEERKRRLEEQRREEM  
QEKQRKQKEELKRKREEEKKRIREQKRLEQEKLQKEKEEEERQRLIAEDALRKQKLNEEQ  
TSANILSAKPFTENG VGNPVSSQSHPNMTNYQEDNSCSINDEILKMVNSVAASKPVSP TG

FNVHDL LLPSTNNQMPAMEQSHLPQPGNQNNHFGTTTTIPNALDLATKSSSLQTENNYLMNS  
QTLENTSLLMHNNSSPTKLLPNDFGLSSWGGLTNTMSINPTCKPPVIQTSEMESQAHKSS  
PQATMPSFGLPNGGTHRKSFTDELNTLTSMLSSSGFADTSLSSSGFPPSQRSVWNDQKSS  
FSGPSTAGNFNNSIQSGMLLAPTLGVSVEFPNRTSIWDSSTTPMMNKSELSGRNITSTA  
QDSPAFMASNIWSSNSQYNSPYLTSNVLQSPQISSGVDESHILDSIYNTYLAISPQDSL  
PYIAIGTLFQNLVGLNLDYSTFINKLISMQGAYNCEFFTDNNGSITHVRFARQTPAGHSK  
GLLNQLFSGLNDPTATPFTSRPHTSTRASFPIASSTTQTS

>YNR050C

MGKNVLLLGS GFVAQPVIDTLAANDDINVTVACRTLANAQALAKPSGSKAISLDVTDDSA  
LDKVLADNDVVISLIPYTFHPNVVKS AIRTKTDVVTSYISPALRELEPEIVKAGITVMN  
EIGLDPGIDHLYAVKTIDEVHRAGGKLSFLSYCGGLPAPEDSDNPLGYKFSWSSRGVLL  
ALRNSAKYWKDGKIETVSSEDLMATAKPYFIYPGYAFVCYPNRDSTLFKDLYHIPEAETV  
IRGTLRYQGFPEFVKALVDMGMLKDDANEIFSKPIAWNEALKQYLGAKSTSKEDLIASID  
SKATWKDDEDREILSGFAWLGLFSDAKITPRGNALDTLCARLEELMQYEDNERDMVVLQ  
HKFGIEWADGTTETRTSTLVDYGKVGGYSSMAATVGYPVAIATKFVLDGTIKGPGLLAPY  
SPEINDPIMKELKDKYGIYLKEKTV

>YNR051C

MGVTVQDICFAFLQNYERMRTDPSKLAYFYASTAELTHTNYQSKSTNEKDDVLPTVKVT  
GRENINKFFSRNDKVRSLKLDKLDTIDFQYTGHLHKSILIMATGEMFWTGTTPVYKFCQTF  
ILLPSSNGSTFDITNDIIRFISNSFKPYVLT DASLSQSNEENS VSAVEEDKIRHESGVEK  
EKEKEKSPEISKPKAKKETVKDTTAPTESSTQEKPIVDHSQPRAIPVTKESKIHTETVPS  
STKGNHKQDEVSTEELGNVTKLNEKSHKAEKKAAPIKTKEGSVEAINAVNNSLPLNGKEV  
SDEKPVPGGVKEAETEIKPIEPQVSDAKESGNASTPSSSPEPVANPPKMTWASKLMNEN  
SDRISKNNTTVEYIRPETLPKKPTERKFEMGNRRDNASANSKNKKKPVFSTVNKDGFPYI  
YIRGTNGLREEKLRSALKEKEFGKVMRITAADNFVVD FETQKSQIDALEKKKKSIDGIEV  
CLERKTVKKPTSNNPPGIFTNGTRSHRKQPLKRKD

>YOL039W

MKYLAAYLLLNAAGNTPDATKIKAILESV GIEIEDEKVSSVLSALEGKSVDELITEGNEK  
LAAVPAAGPASAGGAAAASGDAAAEEEEEKESDDEEESDDDMGFGLFD

>YOR106W

MSFFDIEAQSSKGNSSQQEPQFSTNQKTKELSNLIETFAEQSRVLEKECTKIGSKRDSKEL  
RYKIETELIPNCTSVRDKIESNILIHQNGKLSADFKNLTKYQSLQQSYNQKSLFPLKT  
PISPGTSKERKDIHPRTEAVRQDPESYISIKVNEQSPLLHNEGQHQLQLQEEQEQQQQG  
LSQEELDFQTIHQERSQQIGRIHTAVQEVNAIFHQLGSLVKEQGEQVTTIDENISHLHD  
NMQNANKQLTRADQHQRDRNKCGKVTLIIIVVCMVLLAVLS

>YOR014W

MMRGFKQRLIKTTGSSSSSSSKKKDKKEKEKEKSSTTSSTSKKPASASSSSHGTTTHSSAS  
STGSKSTTEKKGQSGSVPSQGGHHSSSTSKTKTATTPSSSSSSSRSSSVSRSGSSSTKKT  
SSRKGQEQSKQSQQPSQSQKQSSSSSAAIMNPTPVLTVTKDDKSTSGEDHAHPTLLGAV  
SAVPSSPISNASGTAVSSDVENGNSNNNNMNINTSNTQDANHASSQSIDIPRSSHSFERL  
PTPTKLNPDTDLELIKTPQRHSSSRFEPSTRYTPLTKLPNFNEVSPEERIPFIKVDQCN  
TMFDFNDPSFDIQGKEIKRSTLDELIEFLVTNRFTYTNEMYAHVVNMFKINLFRPIPPV  
NPVGDIDYDPDEDEPVNELAWPHMQAVYEFFLRFVESPDFNHQIAKQYIDQDFILKLELFL  
DSEDIRERDCLKTTLHRIYGKFLSLRSFIRSMNINFLQFIYETEKFNVAELLEILGSI  
INGFALPLKEEHKVFLVRILIPHLKVRCLSLYHPQLAYCIVQFLEKDPLLTEEVMGLLR  
YWPKINSTKEIMFLNEIEDIFEVIEPLEFIKVEVPLFVQLAKCISSPHFQVAEKVLSYWN  
NEYFLNLCIENA EVILPIIFPALYELTSQLELDTANGEDSISDPYMLVEQAINSGSWNRA  
IHAMAFKALKIFLETNPVLYENCNALYLSSVKETQQRKVQREENWSKLEEYVKNLRINND

KDQYTIKNPELRNSFNTASENNTLNEENENDCDSEIQ

>YOR038C

MRLLKYPLDIHNEQVNALALGPYIILAGSGGHVMAWRQQQLVDTAFDRVMIKDLKPEVS  
FQVDQDQTTGDIFFITGDLETLYIGSEHRLWGYSGWLCRDTNNINSVEKMNSKLLFECKSP  
STITDVKYDINLGLILFVLLSNENKILLFRHKTFDKLESEITIDKASKPITGIIDPTGQTFT  
VMTSDRSILVYQINKTGTHKLINKLTQHVMYPLHYRISMSPQADILPVINSVKGVPNNA  
TSCTALLDRNNNYKVTKTLVTPSSNGCRVLVYSPAFYEKPNLKKGTSTRYNLIATSGSTD  
GTILVWNTKRMKPLFNALQVSSTAINDMSWSQDGF~~TLFAISNDATLYTFAFQEKDLGVAL~~  
PQTEIKSLQEVENKKLPKLEEPLAEQIPKSPENIKLEESASAAPIPNDIGRSAVGGKPTK  
KKTANNQTNGIKTIQSTSMEFNTPSYTVPRDLKRKPKKEATPSNIAPGSKKQKKELOPIDF  
LDTGLLLNTSFSRIRLATPKIRSTFKYSPINPNLILDVKNNGSGNEQRPTIVKLTSKVL  
DQDQVLFQDFIPKLITICTAGDTFWSFCSEDSIYIYSDSGRKLMAPLVLGVVSISFLEAC  
GTYLLCLTSIGELYCWNIEQKKLAFPTNTIYPLLNPRLRYSDDILTRAENITLCSITKKG  
VPLVTLNNGDGYLFDKNMETWLLVSDGWWAYGSQYWDTTNTTGLSSSKANTDSFNNGSEN  
INEIVSDIKNDNQSIINFLECKTNDENLRKGRKLNLRQFARTILMKEGFENMEEIVTLSH  
LENKILISIRLEEPEEFSKLMVMVYCIRLSELGYMDRLNDVFQWLYDDLPISGTGSAFADK  
DFKRNLKKILACGDIRQVQRVTTRYAKEMNIIS

>YOR078W

MSNGHVKFDADQASASAVTDRQDDVLVISKKDKEVHSSSDEESDDDDAPQEGLHSGK  
SEVESQITQREEAIRLEQSQLRSKRRKQNELYAKQKKSUNETEVTDEVI AELPEELLKNI  
DQKDEGSTQYSSSRHVTFDKLDESDENEALAKAIKTKKRKTLKNLRKDSVKRGKFRVQL  
LSTTQDSKTLPPKKESSIIRSKDRWLNRRKALNKG

>YOR382W

MKFSTIFGATTVMATAVSAAAVSSVMTTKTITATNGNNVYTKVVTDADPIISYSTTRTV  
VSNSDATYTKVVTEGPDTTSEKSTTKTLTLTNGSGSSTNLYTKVTQAVESSTSSSSSSS  
SSSSASSSGAAPAFQASV GALALGLISYLL

>YOR235W

MGLYRPSKFFHPPHIPFTINPDFFSFHIQRLKAKANPENFLICFPDPDIYKGFVFCCQ  
LDLVHLFSYVFFLFLKICVDVLQYVIYPKHFTHKKPGFENYSI

>YOR293W

MLMPKEDRNKIHQYLFQEGVVVAKKDFNQAKHEEIDTKNLYVIKALQSLTSKGYVKTQFS  
WQYYYYTLTEEGVEYLREYLNLP EHVPGTYIQERNPTQRPQRRY

>YPL157W

MGRTFIHASKIKHAARKRKHHSNFRTLKLLNNDAYKIESSKPLKNGKLFKYWKNRRRLF  
SKIDSASIYMTDELWFSVTPERACFLANFVKACMPNAERILDVFCGGGGNTIQFAMQFP  
YVYGVDSIEHIYCTAKNAQSYGVDDRIWLKRGSWKKLVSKQKLSKIKYDCVFGSPPWGG  
PEYLRNDVYDLEQHLKPMGITKMLKSFLKLSPNVIMFLPRNSDLNQLSRATRKLGPFAK  
CKVLYVKENGYMKGIFCMWGEFFNYEPASTENSRESSEKEELSSENEELSKRKKHEST  
TTTKDNTVDIYDVNG

>YPR172W

MAWTSTLPAHLLNLIKNSKYVHVATCSKDCIPSV ALMNYIYVPGEKLFQTDNKNDYIIF  
VSPQDTQKFYNIKENPKVALLFHDWIIANNLSVGKESISGTPTPTSIPHEEQRQSELLNL  
LQELNQAELNQMSASIGGETEIVNPESEESKYKDLILKANPDAKAFIFEKNTAVVKVRI  
DNARVSNENRTMFLSKGKS

>YFLO01W

MSNFIRRLVGKMKAI STGTNAIVSKKDSIYANWSKEQLIRRITELENANKPHSEKFQHIE  
DNKKRKISQEEVTRSKAKKAPKKFDFSKHNTRFIALRFAYLGWNYNGLAVQKEYTPLPTV  
EGTILEAMNKCKLVPSMVLQDYKFSRCGRDCKGVSAMNQVISLEVRSNLTDEEQRDPTND  
SREIPYVHVLNQLLPDDIRISAVCLRPPPNFDARFSCVHRHYKYIFNGKNLNIEKMSKAA  
SYFVGERDFRNFCCKLDGSKQITNFKRTIISKILPLSETFYCFDLVGS AFLWHQVRCMMA  
ILFLVGQSLEVPEIVLRLTDIEKTPQRPVYEMANDIPLLLYDCKFPEMDWQEPTVDDYKA  
IKFTTATEALTLHYELKAAVCNIFKDVLP TANTN NFSKTIINLGDGRGKVVGT YVKLEDR  
SVM EPVEVVNAKYSKKKNKNK

>YNL284C

MKAERQTGLRNSFTTVIGRKLINTFVPSMMLTSVAGNDIFFRGLFKSPVLA FQSYRYVSI  
LGQLKPSDGSTKSFKRLGRGPSSGLGKTSGRGQKKGQKARGKVKS WFEGGQTP IYKLPKI  
GFTNVGAKPLKELNLKRIQWFHDKNRLHLQPGEVLD MNKMRKLG LVTGPIKYGVKILASG  
KFHYNLPIALEASRASAKAIAAIEKAGGKFTARYYTPLGLRAHLNPQWFLEKRGRVPLQA  
RPTKRRDIDFYSKEEKRGYLVMEKDKLLQDIKEAQNKGSRHFLKQNVKKSLEIELEELS  
PEKDWVPVVSNSKVMNIKALDH

>YLR238W

MTGPGPEINKEEHPSSPGKKQITYNSIPKNANLIDGSTNSSKRPIEKYDKRIADPTKSYF  
PHSISRTPRRKYTYILVLTSLNGTFESKHVVIPFKPDGLKLGRPVANSNSSSSSSSLRGGK  
RVDSHTFSQVRS DNGNFDSRVL SRNHALLSCDPLTGK VYIRDLKSSNGTFINGQRIGSND  
VEIKVGDVIDLGTDIDTKIEHRKISATVEELFVQPLLESPIFENEDSDDCHTITEKEEAA  
AITSHIYGDSNNLEEEVILGSDTEILSGIFINNCIGTSPTLSNIIKT LAMEIPFSKCDN  
FKLQSMENFLINYTTHLEYTNKLLVEKNDQQLVKLQNGLRRLKLSGKYEKIIEQNRNQVKQ  
LERDHMFFKKSFEVKKRRNNEKQKSMEREIEDLKTRLEVERYKNSQMMKKNKQKEQELST  
ASKKKTTEHDTRGVPGMNPKGTDKFSIKNTLCNHFTLLTFGTISIGIIAIVFKILSPN

>YBR201W

MDAVILNLLGDIPLVTRLWTIGCLVLSGLTSLRIVDPGKV VYSYDLVFKKGQYGRLLYSI  
FDYGAFNWISMINIFVSANHLSTLENSFNLRKFCWII FLLL VILVKM TSIEQPAASLG V  
LLHENLVYYELKKNGNQMNVRFFGAIDVSPSIFPIYMNAV MYFVYKRSWLEIAMNFM PGH  
VIYYMDDIIGKIYGIDLCKSPYD WFRNTETP

>YBR076W

MDYGYFFPAQRIEETNGVDFWIDSNAEFTQSKRPDSSTSTLSRVLTDTTNVSNNSGSLKR  
KTIKNKIFPQRKIFNDS ENDFGKANTDCKHVFKSISKQLIFLPRCFQHHSIRGWMKDRY  
SEFGYKIKRNQNCPPSACVQALYNTSRSNTEESNPNSLD SLIMYKYMRYSEKKKELMCRF  
CQGNWILAENYLKHLFFAHGILSEFKPHTLYHFESKLLKIQQKLNFKIQVLKEPEFSK  
ILNSLTVSIIPSPLAYYTQTLNGGFRRIHVKCPHCENWIRLGWCEYDEIIRDSFQDFESL  
RNLNADYNGMSYIQTRNREDIEGIYENYFTHYIQCDLATFR TKCLYVQVITKSN

>YBR106W

MNPQVSNIIMLVMMQLSRRIDMEDPTIIMYIRILYCSSIGISWIIYQMARKRIVAKNDM  
TTMKYVEPGNAMSGEKEKLQVTTVRDYDLKEIDSAIKSIYTG MAMMGFMHLYLKYTNPLF  
MQSISPVKSALEHNEVKIHLFGK PATGDLKRPFKAPSLFGGMGQTGPKTDKKSIEEAERA  
GNAGVKA E

>YGL174W

MALHQYLSETYGPTKPKNKTKKKKKESKSDANS DKTSLIVKERLSTLQQEQEKSGVASFS  
KFDKQKSKNIWKNLETNELSHAITHPSASSITGNESKNDLKEIRAQEPLVTVADKSKTRK  
TIYRDAQGHKIQEDSKIDDSSFSRSKYEDEKAAEREQYLKNLNMGDVQKLGINVDAHDKK  
KNQTASSLTIEDPAITFTHDKERTVKTSLGRKLYDKPAPENRFAIMPGSRWDGVHRSNG  
FEEKWFAKQNEINEKKVQSYTLQEDY

>YGL199C

MEMYEISDTLWCGLVSLRCNAITSKMNQLDTNRLNSDRACDTNREYNMINARGAHRSQL  
AEMSLSAAPISSEGLKNEGKCGYTTCSLELISTTSRFSVCSTVSSSVPLLPEFCIVPP  
MLSATPPEAAKGASGSMKSGSIVVSSLPYDILPALL

>YGL199C

MEMYEISDTLWCGLVSLRCNAITSKMNQLDTNRLNSDRACDTNREYNMINARGAHRSQL  
AEMSLSAAPISSEGLKNEGKCGYTTCSLELISTTSRFSVCSTVSSSVPLLPEFCIVPP  
MLSATPPEAAKGASGSMKSGSIVVSSLPYDILPALL

>YGL031C

MKVEIDSFSGAKIYPGRGTLFVRGDSKIFRFQNSKSASLQKRNPRRIAWTVLFRKHHK  
KGITEEVAKKRSRKTVKAQRPITGASLDLIKERRSLKPEVRKANREEKLANKEKKAEK  
AARKAEKAKSAGTQSSKFSKQQAAGAFQKVAATSR

>YLR234W

MKVLCAEKNSIAKAVSQILGGGRSTSRDSGYMYVKNYDFMFSGFPFARNGANCEVTMTS  
VAGHLTGIDFSDSHGHWGKCAIQELFDAPLNEIMNNNQKKIASNIKREARNADYLMIWTD  
CDREGEYIGWEIWQEAKRGNRLIQNDQVYRAVFSHLERQHILNAARNPSRLDMKSVHAVG  
TRIEIDLRAGVTFRLLTETLRNKLNRNQTMTKDGAKHRGGNKNDSQVVSYGTCQFPTLG  
FVVDRFERIRNFVPEEFWYIQLVVENKDNNGGTTTFQWDRGHLFDRLSVLTFYETCIETAG  
NVAQVVDLKSPTTKYRPLPLTTVELQKNCARYLRLNAKQSLDAAEKLYQKGFISYPRTE  
TDTFPHAMDLKSLVEKQAQLDQLAAGGRTAWASYAASLLQPENTSNNNKFKFPRSGSHDD  
KAHPPIHPIVSLGPEANVSPVERRVYEVVARHFLACCESEDAKQSMTLVLDWAVERFSAS  
GLVVLERNFLDVYPWARWETTKQLPRLEMNALVDIAKAEMKAGTTAPPKPMTESELILLM  
DTNGIGTDATIAEHIDKIQVRNYVRSEKVGKETYLQPTTLGVSLVHGFEAIGLEDSFAKP  
FQRREMEQDLKKICEGHASKTDVVKDIVEKYRKYWHKTNACKNTLLQVYDRVKASM

>YGL049C

MTDQRGPPPPHPQQANGYKKFPPHDNQYSGANNSQPNNHYNENLYSAREPHNNKQYQSKN  
GKYGTNKYNNRNSQGNAQYNNRNFNGYRLNNNDYNPAMLPGMQWPANYYPQMYIIPQ  
QMVPVASPPYTHQPLNTNPEPPSTPKTTKIEITTKTGERLNLKFFHEEKKASKGEEKNDG  
VEQKSKSGTPFEKEATPVLPAEAVKDTLTETSNEKSTSEAENTKRLFLEQVRLRKAAME  
RKKNGLISETTEKKQETSNDHNTDTTKPNSVIESEPIKEAPKPTGEANEVVIDGKSGASVK  
TPQHVTGSVTKSVTFNEPENESSQDVDELVKDDDTTEISDTTGGKTVNKSDDDETINSVI  
TTEENTVKETEPSTSDIEMPTVSQLETLGKAQPISDIYEFAYPENVERPDIKYKPSVK  
YTYGPTFLLQFKDKLFRPDPAWVEAVSSKIVIPPHIARNKPKDSGRFGGDFRSPSMRGM  
DHTSSSRVSSKRRSKRMGDDRRSNRGYTSRKDREKAAEKAEQAPKEEIAPLVPSANRWI  
PKSRVKKTEKKLAPDGKTELFDKEEVERKMKSLLNKLTLEMFDSSISSEILDIANQSKWED  
DGETLKIVIEQIFHKACDEPHWSSMYAQLCGKVVKDLDPNIKDKENEGKNGPKLVLHYLV  
ARCHEEFKGWADKLPAGEDGNPLEPEMMSDEYIAAAAKRRGLGLVRFIYLYCLNLLT  
GKMMFECFRRLMKDLNNDPSEETLESVIELLNTVGEQFEHDKFVTPQATLEGSVLLDNLF  
MLLQHIIIDGGTISNRIKFKLIDVKELREIKHWNSAKKDAGPKTIQQIHQEEEEQLRQKKN  
QRSNSRFNNHNQSNRNRYSSNRRNMQNTQRDSFASTKTGFRNNQRNARKVEEVSQAPRA  
NMFDALMNNNDGSD

>YBR093C

MFKSVVYSILAASLANAGTIPLGKLADVDKIGTQKDIFPFLGGAGPYYSFPGDYGISRDL  
PEGCEMKQLQMVGRHGERYPTVSLAKTIKSTWYKLSNYTRQFNGLSFLNDDYEFFIRDD  
DDLEMETTFANSDDVLNYPYTGEMNAKRHARDFLAQGYMVENQTSFAVFTSNSKRCHDTA  
QYFIDGLGDQFNITLQTVSEAESAGANTLSACNSCPAWDYDANDDIVNEYDTTYLDDIAK  
RLNKENKGLNLTSTDASTLFSWCAFEVNAKGYSDVCDIFTKDELVHYSYYQDLHTYYHEG

PGYDIKSVGSNLFNASVKLLKQSEIQDQKVWLSFTHDTHDILNFLTLAGIIDDKNNLTAE  
YVPMGNTFHRSWYVPQGARVYTEKFQCSNDTYVRYVINDAVVPIETCSTGPGFSCEIND  
FYDYAEKR VAGTDFLKVCNVSSVSNSTELTFYWDWNTTHYNASLLRQ

>YDR128W

MCSSINEGPYNSPTFGKSLKVDGGFNAV SINPSGRDIVLASRQGLYIIDLDDPFTPPR  
WLHHITPWQVADVQWSPHPAKPYWIVSTSNQKAIWNLAKSSSNAIEFVLHGHSRAITDI  
NFN PQHPDVLATCSVDTYVHAWDMRSPHRPFYSTSSWRSAA SQVKWNYKDPNVLASSHGN  
DIFVWDLRKGSTPLCSLKGHVSSVNSIDFNRFKYSEIMSSSNDGTVKFDYDYSKSTTESKR  
TVTTNFPIWRGRYLPFGEGY CIMP MVGGNNAVYLINLCDDDDSEQNKKTKLQPIYAFKGH  
SDRVIDFLWRSRHTCDGDYDDREFQLVTWSKDCDLKLWPISDSIYGKVNFDGRGRLEEKL  
PDYDYCSYNKEPENRENVQKNEFRRLRENFVTTSGLKKNKTNHITWLSGIRMNSATSQED  
LFNETKIQNLGEEVSAIGHKFPKVVFEKISVSTRELCLTLNGPWSEENPDDYIFLRISIN  
FPLNYPNKGDPPKFTIEENS NLTMSKRQEILSNLATIGQKYTDSNLYCLEPCIRFVLGEK  
VSLEDIEEGQEPLNF DIADHIDFEELSSLDSSYSDSQNPENLSSQSDIESYKEALVFPD  
TSNQGLDFGRNLALDTPVPNGCGSCWTATGELFCFFANEKKPEKKQNAI I KLSQKEAGV  
EKHPFKIEPQVLYDKEVDSSVITA ADELKARPKRYVDTLGLGGGTNGDSRTYFDDETSSD  
DSFDSVADDWDDILRNDIIVRTKIPILRGNFKAFSSVHSESGKTVESTKKNKNLVISKNF  
SSLLSDRKELALEYLFMDATPEGFARNNALVAEKFDLDEISHCWQILSDMLIDQSDYDPY  
TTIWNNHPMGIKWFIKEAIVYFERQQNLQMLAMLCCVILSARRKKIPARYYGQELNMEG  
TIVFNDNESQNTSFWKGS DAFSTRSRSSVTVPNFYGNHLRGKNIHGGDNSSIRSDDHAR  
LRTHNTLNGSSKFT EPAQKQGSRAISSSPFH SRMPDIKVELLHDDIIEAYEQEDLLHLEV  
SDIPKFQTYIYQYSKLLFRWGLPLERVKILKVSTDFRSSYSSQGIPPNNNKKSPYNGVLT  
HWIENNEFGEEKFLARN CNYCDLRVTRSSFCGNCQHVLHSSCARIWWEIGDECPSGCGC  
NCPMFDA

>YER155C

MKGLLWSKNRKSSTASASSSSTSTSHKTTTASTASSSSPSSSSQTIRNSTSGASPYMHS  
HHHGQGHSHRGEDNNRDKRKSSVFPPSKQYTSTSSSQVNLGMYHSDTNTRSSRSIATL  
KDDSPVCSSEDEISNSSSQSNAQDETPAIYKKS AHSKDSLLPSRSSLSPQSRCTGT  
TLEKSLNTSGISNSSGTNNNSNNNDNEQKQRNVIHLNSEN YDTTVFKTGWVNKSHGQT  
VATNYNSSMTAPSSSSSSSQNL RNDAYS RNRESRFYGN DGSLLKNDDSSSTTATNSGND  
VASARSSMAIDPQMLVPDYRLYRAQLKGCVLNLYKSGLNSNIKFFDPTLPASNSSIANEN  
HQKKKQQTNNQAQAEALHQKQSFQMGEPITLDLKYLSEVYHPDLRQDSDGKIISGTIE  
SLCHTVLFYPGPKQSDVPNEKSLSKTHRAVINLLLMPLLDHFIFLKVFNQFGLSFTKN  
KSRLTNNSTQFYNISPAVDDSM TQRLALTAKTILDVFPGLLDEPMLKTIISLLDTISLH  
NDEISNNLKIKIANKHNELMKLTAFTRSLPMATSS THELEIILDPSHFLSLDITTLADEV  
HHINLKFDK VWAPKFDYSLLYDSKFINRRIVSLNPLVFNNDQNIHFLGRLLISHLFPTNP  
EFSKKVTPKVRAELLDKWWQIGCRFEHLGDMVSWLAVATIICSIPVLRSSSWKYVPDQSL  
KTIFKDWVPTIIQLERRQRTSKSTSSVFILAPPNLDDDFTRANVISYFGDLLIHADDLPS  
DTKFKYLEKKINRTKNAFH KWQQLQAIDSTRHKTNSTENVRDNDSPNNVYQLWKFHLS  
QPPLNIEGIMKLSVQHEPPIIDQKAYSTIGSQR SALVTGSYLPILFNELFPNYSLFPKNT  
LVGAASDAKLPPPRSSARLSKSL SISEPIPIASNSHTMGSLTDDAMSSKNDNNKVTGVGK  
IDGPVIKEMSSKQSNKQRLLSVRDVFNI DMDVFHISDEL VFKSVYDNDGKSRPASMVIE  
TPKRFSQHSSMLINNPATPNQKMRDSLDTTGRLSKTLENMDFFNIGQVSDSLKESIIRV  
VLKSSSLEKIFDLLVLTSNIFSKLVDTKDLENYYYHQRQRGHSTRGLSDDNIGLLDYAFV  
KLTMNDNIFTETFFENTYKSFTTTTTVLENMAKRYVGAKSCSVSISKILDRSDDSKMKINE  
DTNLVSSSLYDQNFVWDMKVTD DENINLIYMAKIQIGAAEAILHLVKNHYSDFTDDLCN  
NSTLLDIIKIMEQEVSTEWPTRIANSKLQKSLPENFVIETENLLTTLTDLFHGIKSAYQK  
QLYRPIGVNRTQKRITDILNSFN TFSFTDLNNIIDDPSFSDDMIRSFQKLHSTNYEDILE  
WIYQLDNFISKKFNLVSKKDWIVLFQELELLSKESLVSFFNYPLHFKSSKLINPGYLQLH  
EFEISNLFTWISTLILKDDNGTESLFF EKLPQSILKLIKHTSLTFFVMEISNVNKSSS  
ERLTCKVILQILNYIRWKNGLDLDFDSEEDESP HAICPHIETAIAHAISPESRN

YELSWIKASEKLSDPTKGTQNLRSISNVLEKIDDIHIKRFIEIDDVFSKNCKNLCPCPGW  
FISRLLEISQFVPNMSITNSKLINFDKRRFVNNIISNVLDLIPNEREFPLDIEMSDENPS  
KRTTFGRILFNNFEDVNKVYRKKTKKVSESEAISERFQEQQVFNEILVNEIEKIKREARK  
LEVLLDQEKILKNSAALHQAVPKKNRKSVIISGTHSDNDHSYNINKNTGQTPSLGSVMES  
NNSARNRRDRASFSTNRSSVVSNSHNGVSKKIGGFFRRPFSIGGFNTSSSNYLSNLIL  
SQEVSSNKLSILPEVDSMQLHDLKPSYSLKTFEIKSIMEIINHRNIPAYYYAFKIVM  
QNGHEYLIQTASSSDLTEWIKMIKASKRFSFHSKKYKGKTHNKIFGVPLEDVCERENTLI  
PTIVVKLLEEIELRGLDEVGLYRIPGSIGSINALKNAFDEEGATDNSFTLEDDRWFEVNA  
IAGCFKMYLRELPSLFSHAMVNDFTDLAIKYKAHAMVNEEYKRMMNELLQKLPTCYYQT  
LKRIVFHLNKVHQHVNNKMDASNLAIVFSMSFINQEDLANSMGSR LGAVQTLQDFIKN  
PNDYFKQ

>YGL105W

MSDLVTKFESLIISKYPVSFTKEQSAQAAQWESVLKSGQIQPHLDQLNLVLRDNTFIVST  
LYPTSTDVHVFEVALPLIKDLVASSKDVKSTYTTYRHILRWIDYMQNLLEVSSTDKLEIN  
HDLDPHEVIEKKKKAPAGGAADAAKADEDVSKKAKKQDHPRGKPDEETLKKLREEAKA  
KKAACKAANAKQQQEQQNKAPEKPKPSAIDFRVGFQKAIKHPDADSLYVSTIDVGDEEG  
PRTVCSGLVKHFPLDAMQERYVVVVCNLKPVNMRGIKSTAMVLCGSNDDKVEFVEPPKDS  
KAGDKVFFEGFGDEAPMKQLNPKKKIWEHLQPHFTTNDGLEVIFKDEEEKDHPVRKLTNA  
KGESFKVASIANAQVR

>YGL136C

MILVYNRIRSISSSLGRIHVRYNSNSQNRWLNRLKDPYTKEAKVQNLRSRAAFKLMQI  
DDKYRLFSKNRTDQRILDLGYAPGAWSQVARQRSSPNSMILGVDILPCEPPHGVNSIQAN  
ILAKRTHDLIRLFFSKHFQLNRHDDLHKDHGYFQNMLEEELTHVKDTELYREIFTSSDIY  
ETPNTNSTLIEREKFPVDVIISDMYEPWPQTTGFWNNITNQAYFRMANTSGVSIRDHYQS  
IDLCDAAALVTAIDLLRPLGSFVCKLYTGEEENLFKKRMQAVFTNVHKFKPDASRDESKET  
YYIGLKKRNVDKLDVFSNS

>YGL154C

MVKTTEVVSEVSKVAGVRPWAGIFVVEIQEDILADEFTFEALMRTLPLASQARILNKKSF  
HDRCSNLCSQLLQLFGCSIVTGLNFQELKFDKGSFGKPF LDNNRFLPFSMTIGEYVAMF  
LVKCVSTDEYQDVGIDIASPCNYGGREELELFKEVFSEREFNGLLKASDPCTIFTYLWSL  
KESYTKFTGTGLNTDLSLIDFGAISFFPAEGASMCITLDEVPLIFHSQWFNNEIVTICMP  
KSISDKINTNRPKLYNISLSTLIDYFIENDGL

>YGR092W

MLSKSEKNVDLLAGNMSNLSFDGHTPGGTGLFPNQNITKRRTRPAGINDSPSPVKPSFF  
PYEDTSNMDIDEVSQPDMDVSNPCKLPPKPYERATS NKTQRVVSVCKMYFLEHYCDMFD  
YVISRRQRTKQVLEYLQQSQLPNSDQIKLNEEWSSYLQREHQVLRKRRLKPKNRDFEMI  
TQVGQGGYGQVYLARKKDTKEVCALKILNKKLLFKLNETKHVLTTERDILTTTRSEWLVKL  
LYAFQDLQSLYLAMEFVPGGDFRTLLINTRCLKSGHARFYISEMFCAVNALHDLGYTHRD  
LKPENFLIDAKGHIKLTDFGLAAGTISNERIESMKIRLEKIKDLEFPAPTEKSIEDRRKM  
YNQLREKEINYANSMVGSPDYMALEVLEGKKYDFTVDYWSLGCMLFESLVGYTPFSGSST  
NETYDNLRRWKQTLRRPRQSDGRAAFSDRTWDLITRLIADPINRLRSFEHVKRMSYFADI  
NFSTLRSMIPPFTPQLDSETDAGYFDDFTSEADMAYADVFKRQDKLTAMVDDSAVSSKL  
VGFTFRHRNGKQGSSGILFNGLEHSDPFSTFY

>YLR264W

MDSKTPVTLAKVIKVLGRTGSRGGVTQVRVEFLEDTSRTIVRNKGPVRENDILVLMESE  
REARRLR

>YOR070C



MGVRSAAKEMHERDHNSDSSSLVTSLMKSWRISSASSKKPSLYKMNTTESTSLPSGYAS  
SADRDRRTSDGNFEAMAKQQASTRRTSNSYSPLRYVNPTLSTASNESPRPALLRQHQR  
HHHHQQPRHSSSGSVGNCSNSTEPNKKGDRYFKDLDEDWSAVIDDYNMPIPILTNNGFG  
TPVAPTRTLRSTSSINSISNMGTSAVRNSSSSFTYPQLPQLQKEKTNDSSKKTQLEIE  
NERDVQELNSIIQRISKFDNILKDKTIINQQDLRQISWNGIPKIHRPVVWKLIGYLPVN  
TKRQEGFLQRKRKEYRDSLKHTFSDQHSRDIPTWHQIEIDIPRTNPHIPLYQFKSVQNSL  
QRILYLWAIRHPASGYVQGINDLVTPFFETFLTEYLPPSQIDDVEIKDPSTYMVDEQITD  
LEADTFWCLTKLLEQITDNYIHGQPGILRQVKNLSQLVKRIDADLYNHVFQNEHVEFIQFA  
FRWMNCLLMREFQMGTVIRMWDTYLSETSQEVTSSYSMSSNDIKPPVTPTEPRVASFVTP  
TKDFQSPPTALS NMTPNNAVEDSGKMRQSSLNEFHVFCVCAAFLIKWSDQLMEMDFQETIT  
FLQNPPTKDWTTETDIEMLLSEAFIWQSLYKDATSHWL

>YOR275C

MSELLAIPLKRTLEVDFA TELSKLIDTTSFQTASFFQSDILKVVDARNNAIAPDISIDGL  
SALKEYYVILLQLEKKFPNNQIEFTWFQTL SQSRGTSQYSLQWEKLTIIYNIGCMYSL  
ALNSNNDAAESLKTSCLYFQNAAGCFKHVLDHQKNLETIPVVDDATLNALTSMLAQAE  
CFWFKAVQDKHKDSLIAKLSQIVDFYCEAINDAQRGKLIRSDWINHLKAKKAYFSAVY  
YRIALSFNEKKQFGNVVKALQMGLQFINESTLSSQAKFKTVVSSLKEAQRDNEFIYLQE  
VPSELPSIKPALMVKPSSSATLLPSIKKDETLFKDLPIEVMEYCTAYNERQDEYVEQRV  
TNPLASLNKLLKESLTTFQIPQGLTKVSEAELSHYQASLNLLINNKNVQVQLDNIEQIL  
NEEAFTDNQLRLKHGTLNWTLPESSTNTAYYEKLLKLRGYLDEGSAIDKQTNELFQSID  
KNLIGSEIRLPESNDPLTNKIKMIIQERNDYIDRTRRKSSEYRILPKIITSYKNGTVDF  
EPIFIGHLKYFDEDLRYVNSTKEENIKLIEEVNLSKKNPGRSGIEPKKMVRIDPRELYI  
EDLRYSFKLLDEVKENLSAGTAFYENLITSTSNLYNEVQEYDTARRAEKARLDKSLTFED  
Q

>YPL106C

MSTPFGDLGNNSVLA VARNRGIDIVVNEVS NRSTPSVVGFGPKNRYLGETGKNKQTSN  
IKNTVANLKRIIGLDYHHPDFEQESKHFTSKLVELDDKKTGAEVRFAGEKHVFSATQLAA  
MFIDKVKDTV KQDTKANITDVCIAVPPWYTEEQRYNIADAARIAGLNPRIVNDVTAAGV  
SYGIFKTDLPEGEEKPRIVAFVDIGHSSYTCSIMAFKKGQLKVLGTACDKHFGRDFDLA  
ITEHFADEFKTKYKIDIRENPKAYNRILTAAEKLKVL SANTNAPFSVESVMNDVDVSSQ  
LSREELEELVKPLLERVTEPVTKALAQAKLSAEVDFVEIIGGTTRIPTLKQSISEAFGK  
PLSTTLNQDEAIAKGAAFICAIHSPTLRVRPFK FEDIHPYSVSYSDWKQVEDEDHMEVFP  
AGSSFPSTKLITLNRTGDFSMAASYTDITQLPNTPEQIANWEITGVQLPEGQDSVPVKL  
KLRCDP SGLHTIEEAYTIEDIEVEEPIPLPEDAPEDAEQEFKKVTKTVKKDDL TIVAHTF  
GLDAKKNELIEKENEMLAQDKLVAETEDRKN TLEEYIYTLRGKLEEEYAPFASDAEKT  
LQGMLNKAEEWLYDEGFD SIKAKYIAYEELASLGNIRGRYLAKEEEKKQAIRSKQEAS  
QMAAMA EKLAQRKAEAEKKEEKKDTEGDVMD

>YDR034C

MFESVNL DENSPEDRELAKVLSPPGSYLS PASLDSGSSFTNSGTSTSCFEPKNNLPSLSF  
LNARAGSLGGIFNHKQMTSPSNSNIGGENVESTTSSNDGSNENAGHPTTSEQDQADHPT  
ISQADDNGHSSLTPNPAVTSTVTDKKGNTV KRKYSRNGCSECKRRRMKCDETKPTCWQCA  
RLNRQC VYVLPKNKKRRTSNAQRVKEFRKHSTSLDNDHNNARKRQHSSCKAEK KKKVRQ  
NLSEDTTDPKPITDNGKNVPLDEIESLEIPNLDLTTMNGYDVNLLMQNLNDMVNMKLHD  
SYLLNEELKGLDLPDLIPELLPASNVNSSVPISFLVNNVITFNTKLSSFKLGGIHDKYL  
KIFYDCLDSIAPFFQNQGNPLRDILLSFAKNEAYLLSSILATGASIA YRKSNNLEDERN  
YCAYL SHCLSLG EQFKNESVNLNRIEPIILTVIMLA WDCIYSMNSQWRSHLKGVTDLFK  
KINAGNSSKVLNVAKCFKVMETFASISTVFGGSLIDNNDLDAIFDPYDYQYVDSLKFLN  
IMTPLNEFNLLRGHKEDFDLVIKEVFKSLNTIRSTEKNYFSKEEGLFTK KLDYLLSSQT  
SSEKSKDQISYFNTQKILVEIDKQLDYEFIDKSGIIPSDNQSHPRISNIHDNAIDMVTLK  
NGEEVAISWYDISHQTQVLSFLLIVLLKLLGMPKESSTIQVVKKIMSFFKFLDSDSPPQ

NSRTCYSNFAVLIAGLNAMDEETRAIVKRYKINGGKFQKLTEHNLNRLEKVWYGKNQNY  
RLEEQDVLTW

>YJL124C

MSANSKDRNQSNQDAKRQQQNFPKKISEGEADLYLDQYNFTTTAAIVSSVDRKIFVLLRD  
GRMLFGVLR~~T~~FDQYANLILQDCVERIYFSEENKYAEEDRGIFMIRGENVVMLGEVDIDKE  
DQPLEAMERIPFKEAWLTKQKNDEKRFKEETHKGKKMARHGIVYDFHKSDMY

>YGL045W

MSLLRLWNKESRAPSKIKSHGIVGSYGNSMLAHNNVKQFRIDIDEPHRVWKP NESITGEA  
VIDIKRDITNVAIKLSLVCEVRVKTGNSPTS~~S~~KNKRIEKTLEKSTFLYGQDYVKTAFA  
KPHVDKTTILNGLSKGEHRFPFRIRIPRGRGMLSSIKFERGSITYFLSCTLES LN  
NING LKKPEARCEREFVIVPLDVSRLPKPKTKTVVLQSASMVQNKKNKSTED  
ESSYTQLTQK STTSNSSSSSVNSKTSPLPNKTVTISVDIPQAGFMIGEII  
PIDVKIDHYKPFYAPAGLTT TLVRICRVGGAGKDDPMETFRKDICQ  
SISPIYINPETLQFQSRVYLKVPLDAFSTLTTVG KFFSFQYYIEVMVN  
LSKKNVYTESNRIIGTPIGEQNGLGVENNINRIQRKMLRMVNPET  
LENDSEGYESSIFFKDMVNVEKLKRLRNVTGMSIETVIGTTRSEQQQSD  
ASIPSQSSITA PQNSPSNLRD~~W~~LAPLNAYDSDDVPVPKYS  
PNDKVSVPSEDKQELEQKRLQQLSDPPPCD  
DY
